# Supplementary material for: Total synthesis of diazaquinomycins H and J using double Knorr cyclization in the presence of triisopropylsilane
Source: PubMed Central journal article supplement — RSC Adv. 2019 Jan 14;9(4):1759–71. doi: 10.1039/c8ra09792e (PMC9059765; doi:10.1039/c8ra09792e), 2019-01-14
Supplement: RA-009-C8RA09792E-s001.pdf [file RA-009-C8RA09792E-s001.pdf]

# Supporting Information for

## Total synthesis of diazaquinomycins H and J using double Knorr cyclization in the presence of triisopropylsilane

Allan M. Prior and Dianqing Sun\*

Department of Pharmaceutical Sciences, The Daniel K. Inouye College of Pharmacy, University  
of Hawaii at Hilo, 34 Rainbow Drive, Hilo, Hawaii, 96720, United States

E-mail: [dianqing@hawaii.edu](mailto:dianqing@hawaii.edu)

### Table of Contents

|                                                                                                                                                                           |     |
|---------------------------------------------------------------------------------------------------------------------------------------------------------------------------|-----|
| <sup>1</sup> H and <sup>13</sup> C NMR, DEPTQ, HBMC, HSQC, COSY, HRMS, and HPLC of diazaquinomycin H ( <b>1</b> ).....                                                    | S2  |
| <sup>1</sup> H and <sup>13</sup> C NMR, DEPTQ, HBMC, HSQC, COSY, HRMS, and HPLC of diazaquinomycin J ( <b>2</b> ).....                                                    | S9  |
| <sup>1</sup> H NMR, DEPTQ spectra and HPLC chromatogram of isomeric mixture of <b>1</b> .....                                                                             | S16 |
| <sup>1</sup> H NMR, DEPTQ spectra and HPLC chromatogram of isomeric mixture of <b>2</b> .....                                                                             | S18 |
| <sup>1</sup> H, <sup>13</sup> C NMR spectra and HPLC chromatogram of compound <b>3a</b> .....                                                                             | S20 |
| <sup>1</sup> H, <sup>13</sup> C NMR spectra and HPLC chromatogram of compound <b>3b</b> .....                                                                             | S22 |
| <sup>1</sup> H, <sup>13</sup> C NMR spectra and HPLC chromatogram of compound <b>3c</b> .....                                                                             | S25 |
| <sup>1</sup> H, <sup>13</sup> C NMR spectra and HPLC chromatogram of compound <b>4a</b> .....                                                                             | S28 |
| <sup>1</sup> H, <sup>13</sup> C NMR spectra and HPLC chromatogram of compound <b>4b</b> .....                                                                             | S30 |
| <sup>1</sup> H, <sup>13</sup> C NMR spectra and HPLC chromatogram of compound <b>5a</b> .....                                                                             | S32 |
| <sup>1</sup> H, <sup>13</sup> C NMR spectra and HPLC chromatogram of compound <b>5b</b> .....                                                                             | S34 |
| <sup>1</sup> H, <sup>13</sup> C NMR spectra and HPLC chromatogram of compound <b>7a</b> .....                                                                             | S36 |
| <sup>1</sup> H, <sup>13</sup> C NMR spectra and HPLC chromatogram of compound <b>7b</b> .....                                                                             | S38 |
| <sup>1</sup> H, <sup>13</sup> C NMR spectra, HRMS, and HPLC chromatogram of compound <b>13</b> .....                                                                      | S40 |
| <b>Scheme S1</b> Synthesis of <b>14</b> with a shorter branched side chain and its <sup>1</sup> H, <sup>13</sup> C NMR spectra .....                                      | S43 |
| <b>Fig. S1</b> <sup>1</sup> H, <sup>13</sup> C NMR spectra comparison of 9-methyldecanoic acid before and after treating with H <sub>2</sub> SO <sub>4</sub> .....        | S45 |
| <b>Fig. S2</b> <sup>1</sup> H, <sup>13</sup> C NMR spectra comparison of 4-methylpentanoic acid before and after treating with H <sub>2</sub> SO <sub>4</sub> .....       | S46 |
| <b>Fig. S3</b> Comparison of NMR spectra for pure diazaquinomycin H ( <b>1</b> ) with isomeric mixture of <b>1</b> .....                                                  | S47 |
| <b>Fig. S4</b> Zoomed <sup>1</sup> H NMR regions of isomeric mixture of <b>2</b> with varying concentrations of CF <sub>3</sub> CO <sub>2</sub> D in CDCl <sub>3</sub> .. | S48 |

# <sup>1</sup>H NMR of diazaquinomycin H (**1**) in 1% CF<sub>3</sub>CO<sub>2</sub>D/CDCl<sub>3</sub>

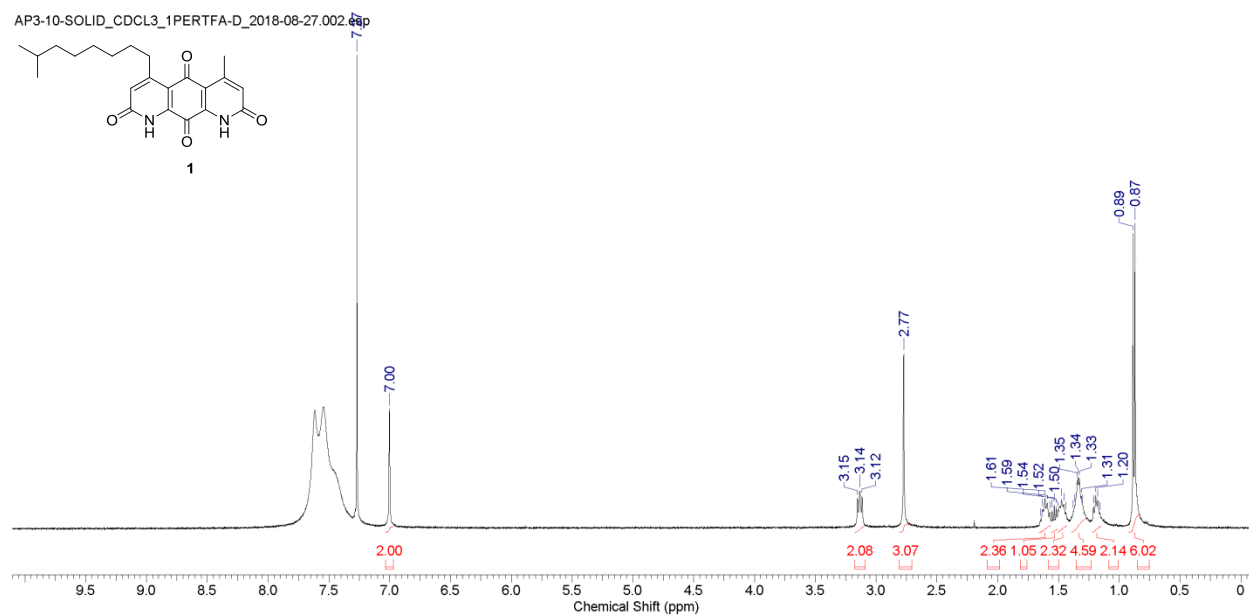

## Zoomed <sup>1</sup>H NMR of **1** in 1% CF<sub>3</sub>CO<sub>2</sub>D/CDCl<sub>3</sub>

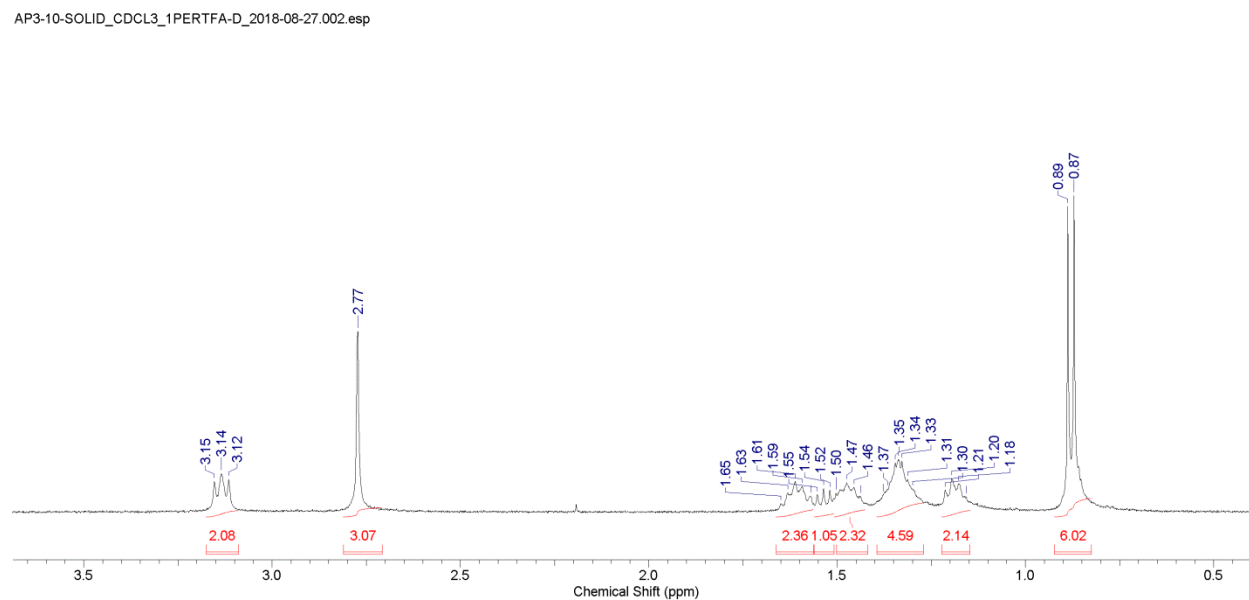

$^1\text{H}$  NMR of **1** in 2%  $\text{CF}_3\text{CO}_2\text{D}/\text{CDCl}_3$

AP3-10-SOLID\_CDCL3\_TFA-D\_2018-08-21.001.esp

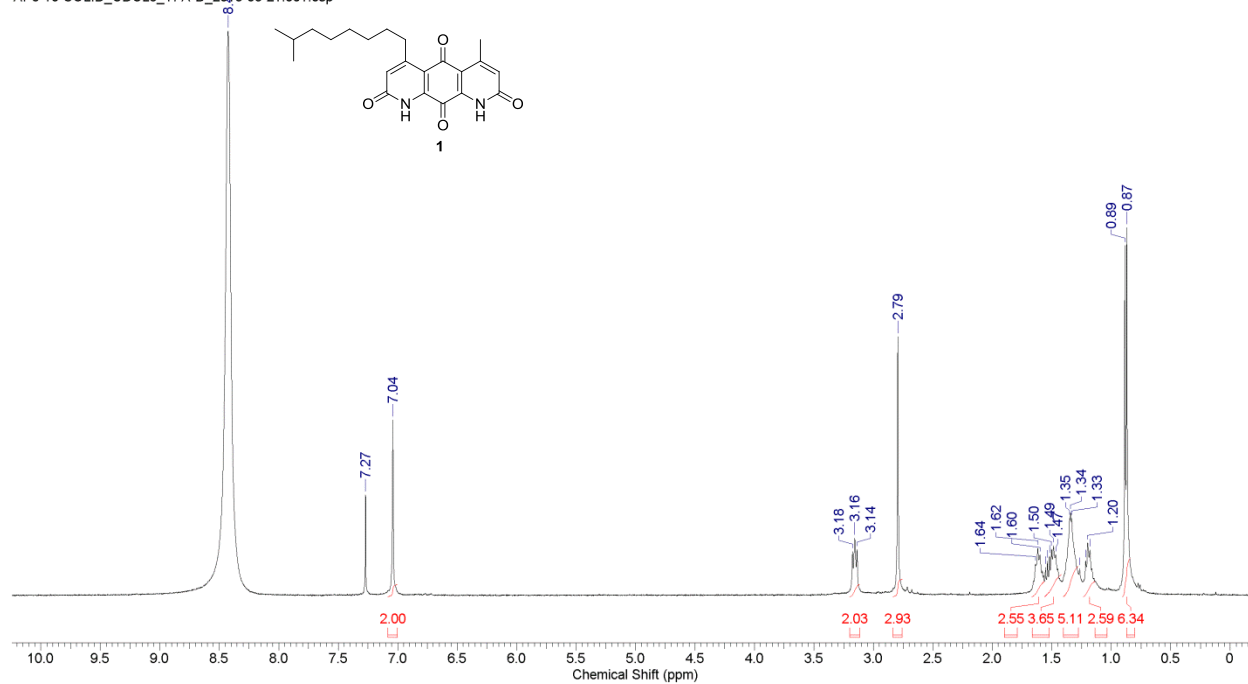

Zoomed  $^1\text{H}$  NMR of **1** in 2%  $\text{CF}_3\text{CO}_2\text{D}/\text{CDCl}_3$

AP3-10-SOLID\_CDCL3\_TFA-D\_2018-08-21.001.esp

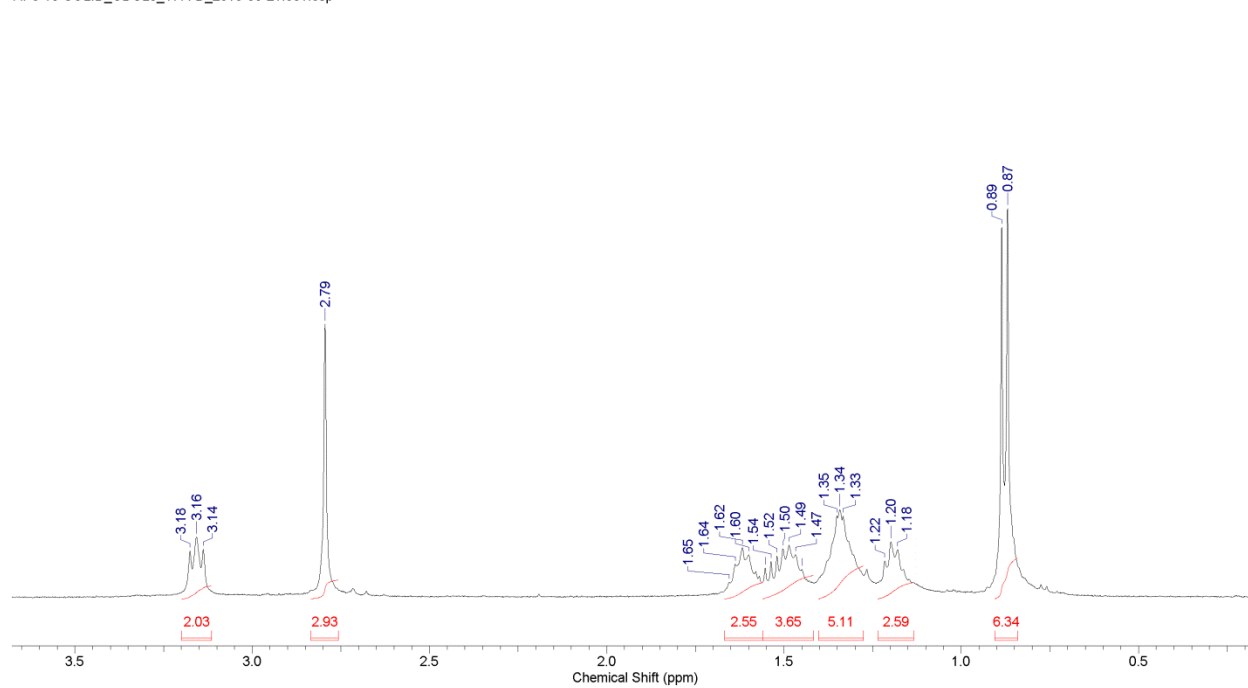

$^{13}\text{C}$  NMR of **1** in 2%  $\text{CF}_3\text{CO}_2\text{D}/\text{CDCl}_3$

AP3-10-SOLID\_CDCL3\_TFA-D\_2018-08-20.010.esp

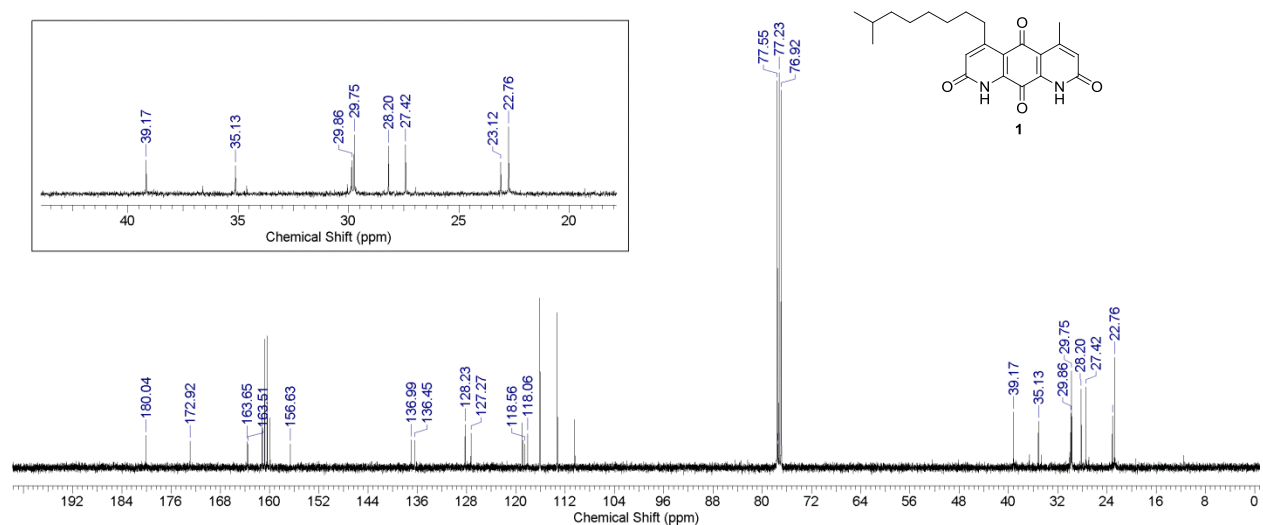

DEPTQ of **1** in 2%  $\text{CF}_3\text{CO}_2\text{D}/\text{CDCl}_3$

AP3-10-SOLID\_CDCL3\_TFA-D\_2018-08-22.020.001.1r.esp

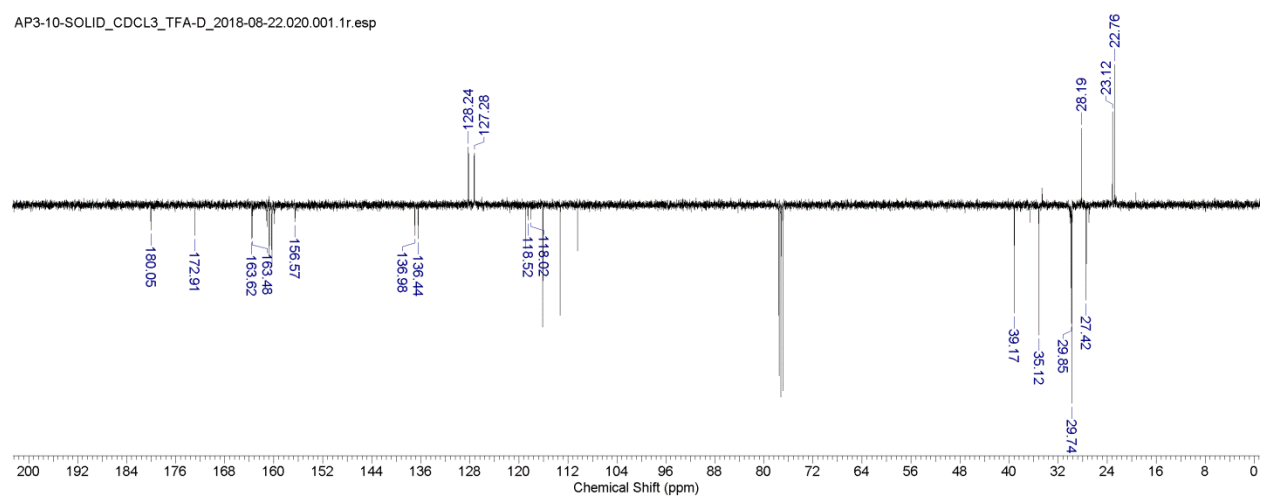

# Zoomed DEPTQ regions of **1** in 2% CF<sub>3</sub>CO<sub>2</sub>D/CDCl<sub>3</sub>

AP3-10-SOLID\_CDCL3\_TFA-D\_2018-08-22.020.001.1r.esp

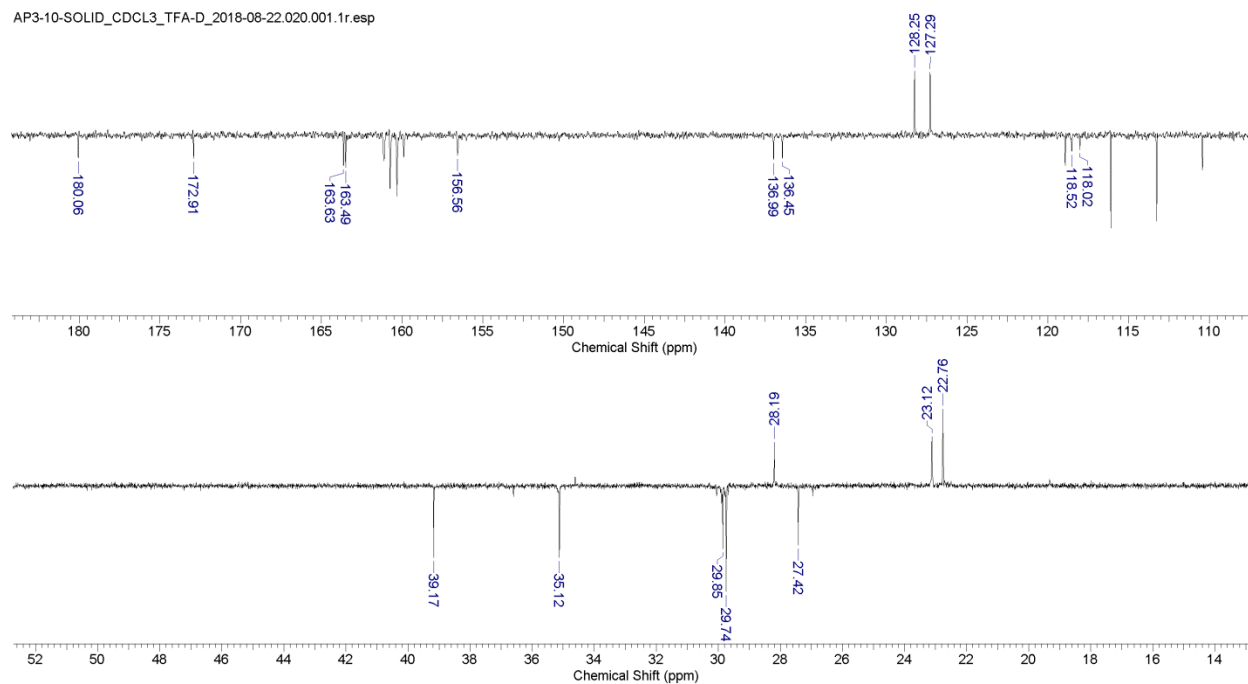

## HMBC of **1** in 2% CF<sub>3</sub>CO<sub>2</sub>D/CDCl<sub>3</sub>

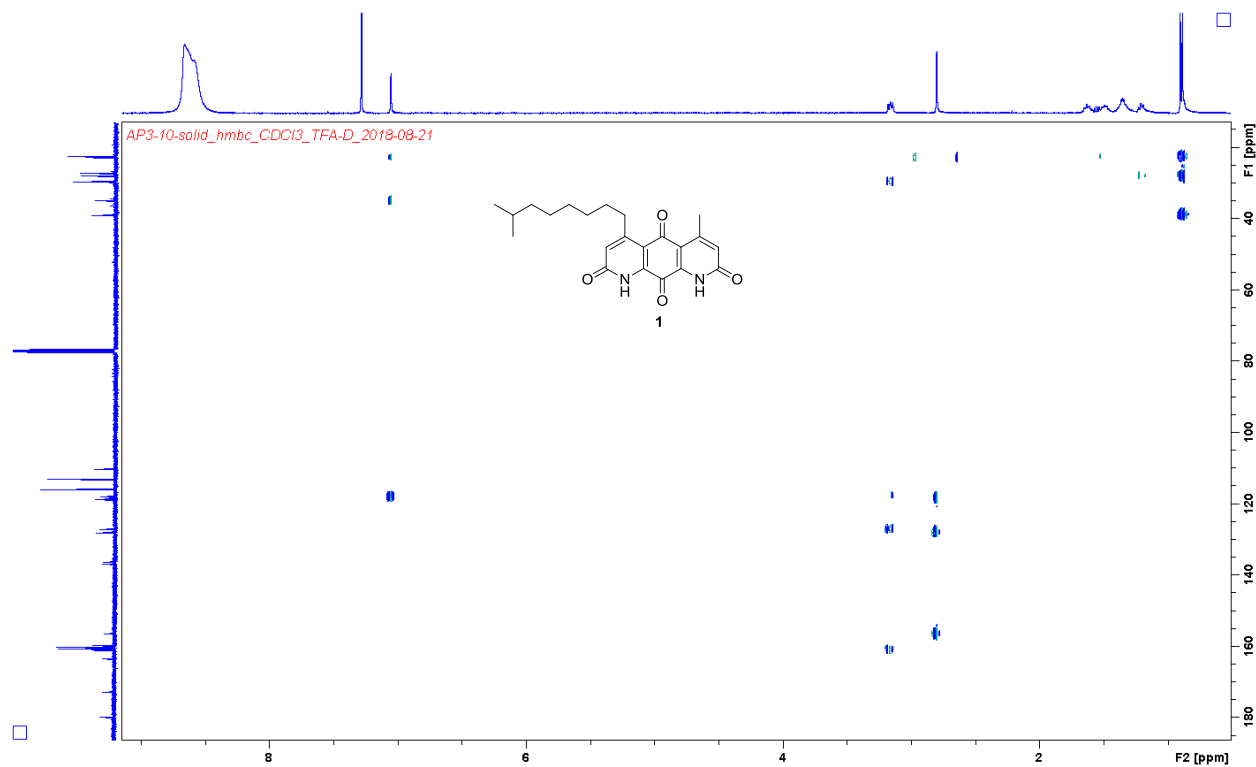

HSQC of **1** in 2% CF<sub>3</sub>CO<sub>2</sub>D/CDCl<sub>3</sub>

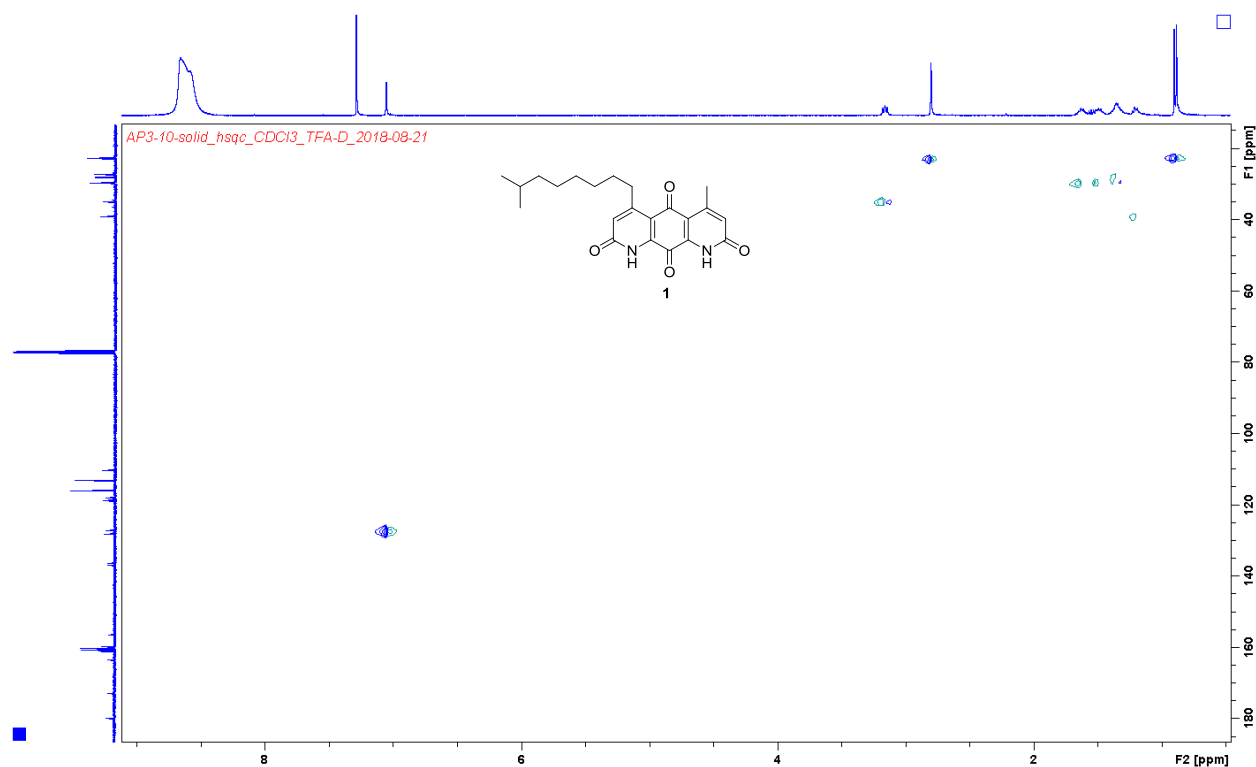

COSY of **1** in 2% CF<sub>3</sub>CO<sub>2</sub>D/CDCl<sub>3</sub>

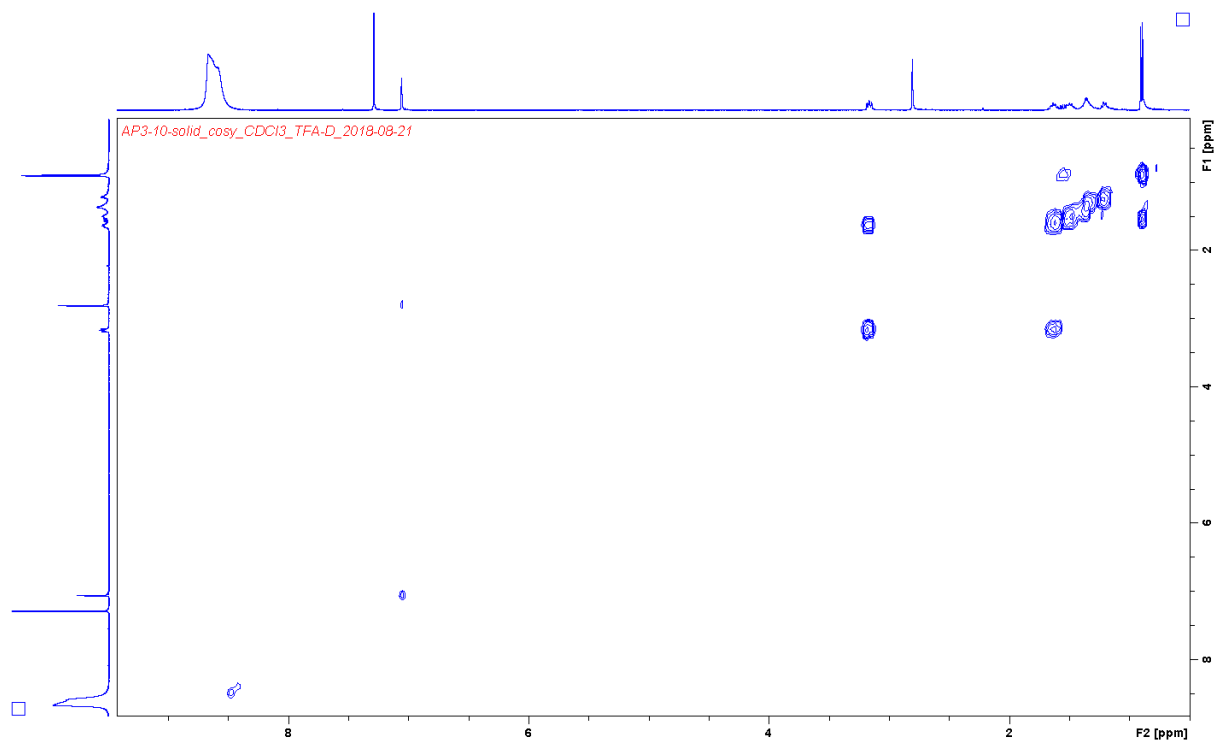

## HRMS of **1**

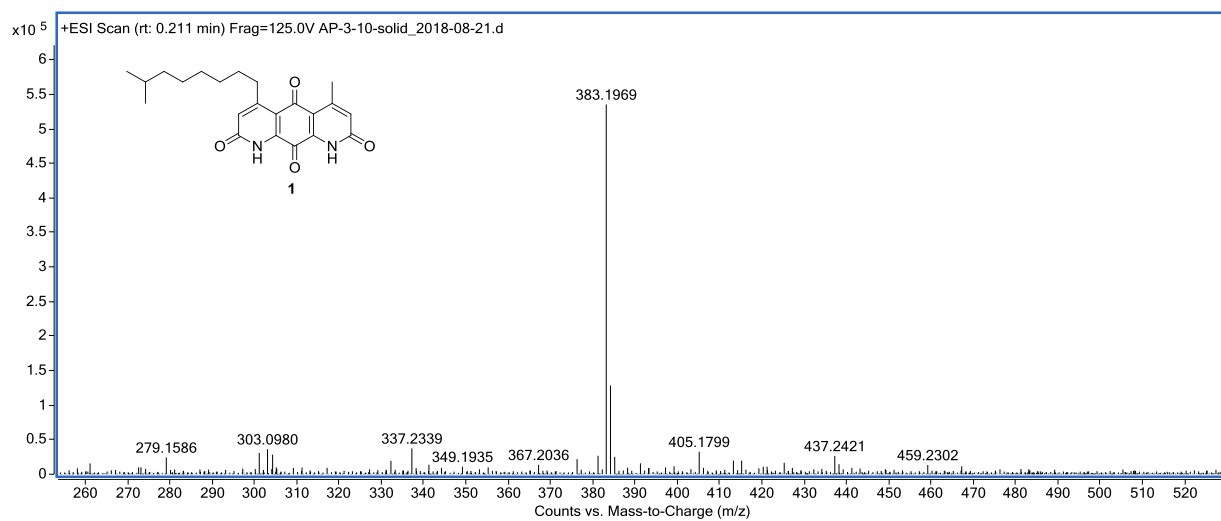

# HPLC chromatogram of 1

8/19/2018 15:03:02 1 / 1

## ==== Shimadzu LCsolution Analysis Report ====

Sample Name : C:\LabSolutions\LCsolution\Sun\Allan Book3\AP3-10-solid-final.lcd  
 Tray# : AP3-10-solid-final  
 Vial # : 1  
 Injection Volume : 43  
 Data File Name : 10 uL  
 Method File Name : AP3-10-solid-final.lcd  
 Batch File Name : SDQ gradient.lcm  
 Data Acquired : 8/19/2018 2:48:05 PM

### <Chromatogram>

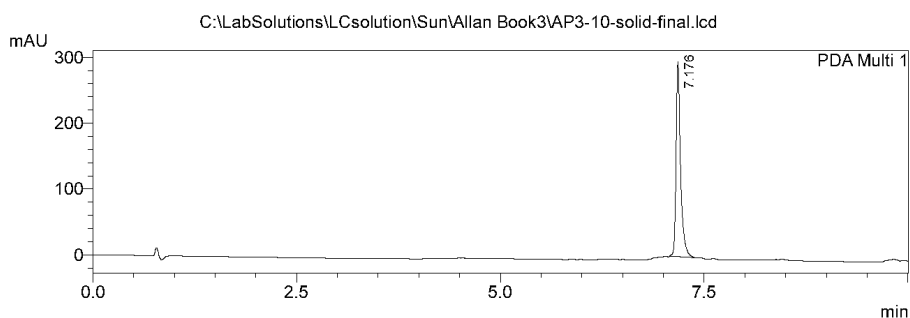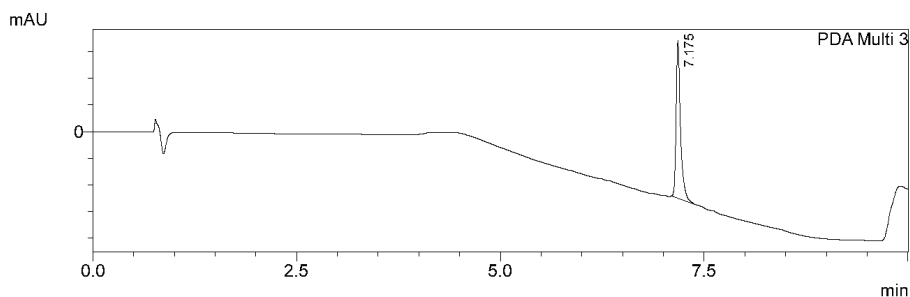

- 1 PDA Multi 1/254nm 4nm
- 2 PDA Multi 3/220nm 4nm

PeakTable

PDA Ch1 254nm 4nm

| Peak# | Ret. Time | Area    | Height | Area %  | Height % |
|-------|-----------|---------|--------|---------|----------|
| 1     | 7.176     | 1122896 | 290447 | 100.000 | 100.000  |
| Total |           | 1122896 | 290447 | 100.000 | 100.000  |

PeakTable

PDA Ch3 220nm 4nm

| Peak# | Ret. Time | Area    | Height | Area %  | Height % |
|-------|-----------|---------|--------|---------|----------|
| 1     | 7.175     | 1101613 | 295726 | 100.000 | 100.000  |
| Total |           | 1101613 | 295726 | 100.000 | 100.000  |

C:\LabSolutions\LCsolution\Sun\Allan Book3\AP3-10-solid-final.lcd

<sup>1</sup>H NMR of diazaquinomycin J (**2**) in 1% CF<sub>3</sub>CO<sub>2</sub>D/CDCl<sub>3</sub>

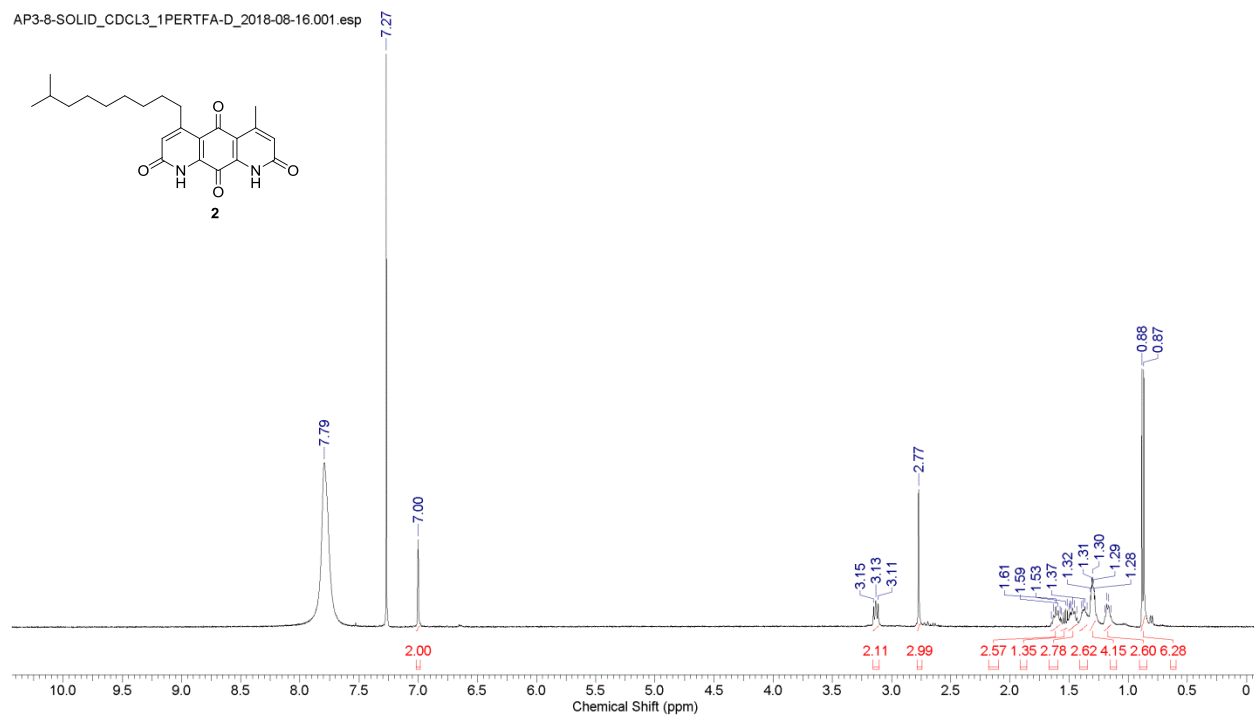

Zoomed <sup>1</sup>H NMR of **2** in 1% CF<sub>3</sub>CO<sub>2</sub>D/CDCl<sub>3</sub>

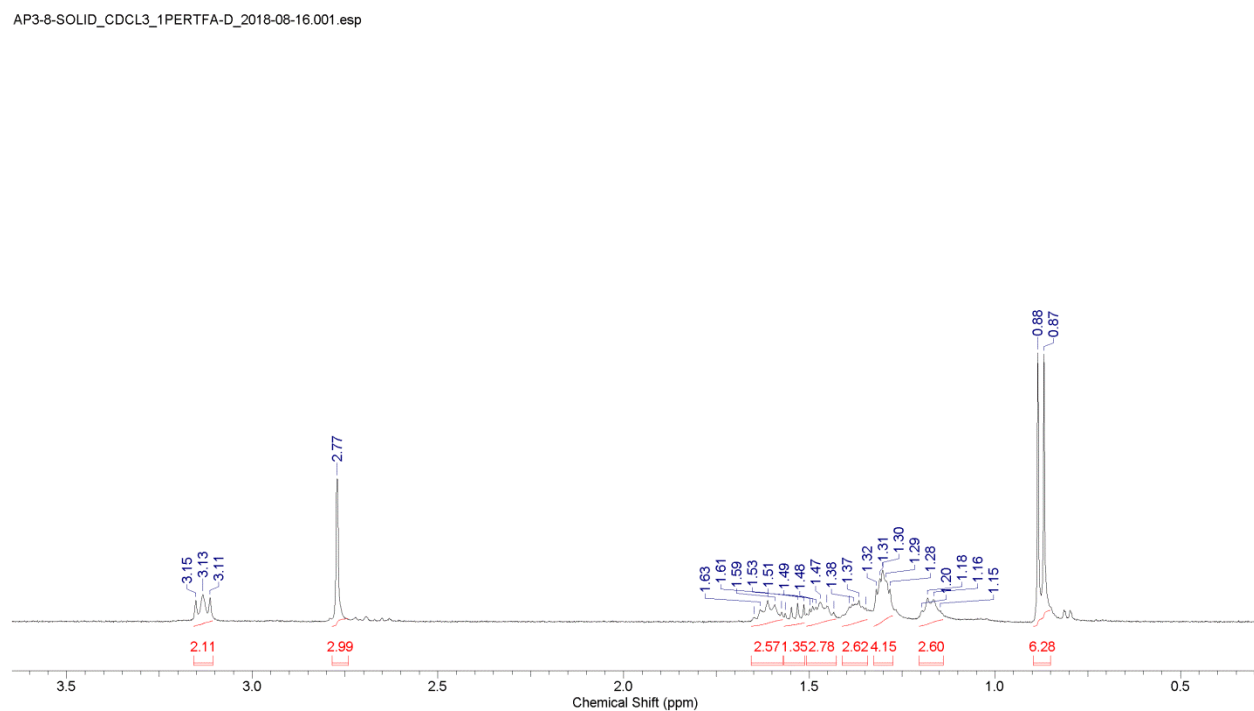

<sup>1</sup>H NMR of **2** in 2% CF<sub>3</sub>CO<sub>2</sub>D/CDCl<sub>3</sub>

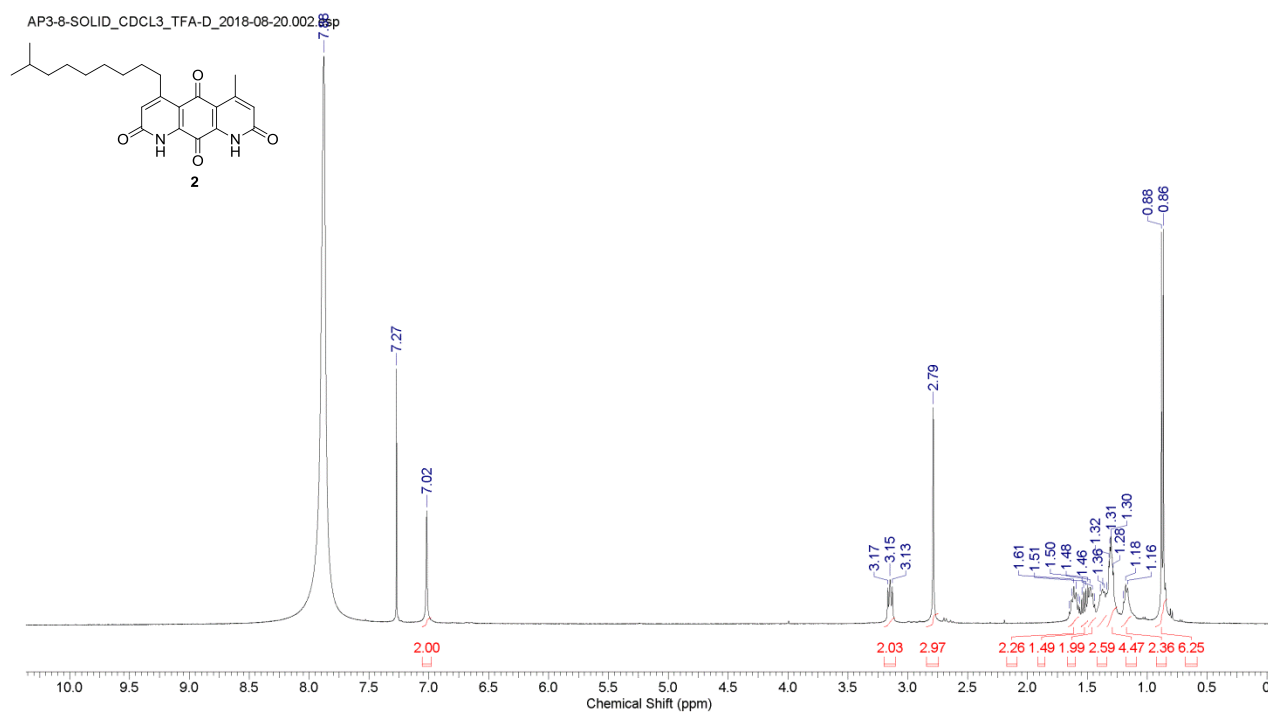

Zoomed <sup>1</sup>H NMR of **2** in 2% CF<sub>3</sub>CO<sub>2</sub>D/CDCl<sub>3</sub>

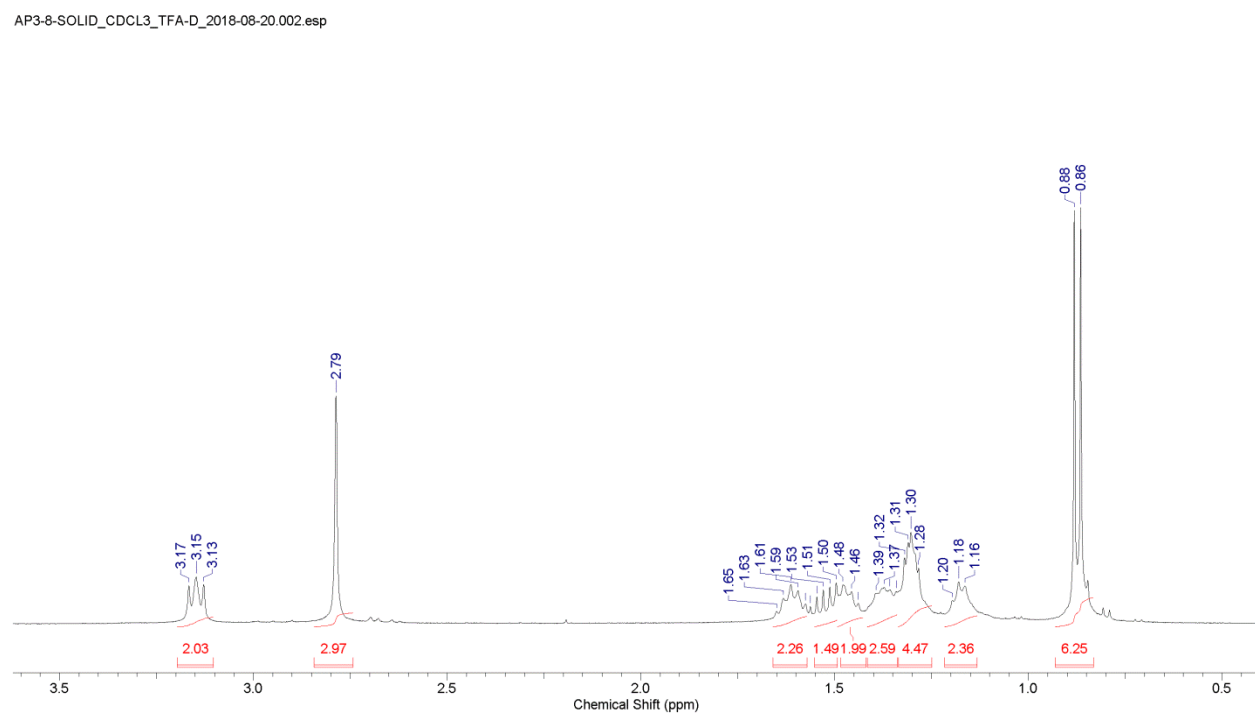

$^{13}\text{C}$  NMR of **2** in 2%  $\text{CF}_3\text{CO}_2\text{D}/\text{CDCl}_3$

AP3-8-SOLID\_CDCL3\_TFA-D\_2018-08-14.011.esp

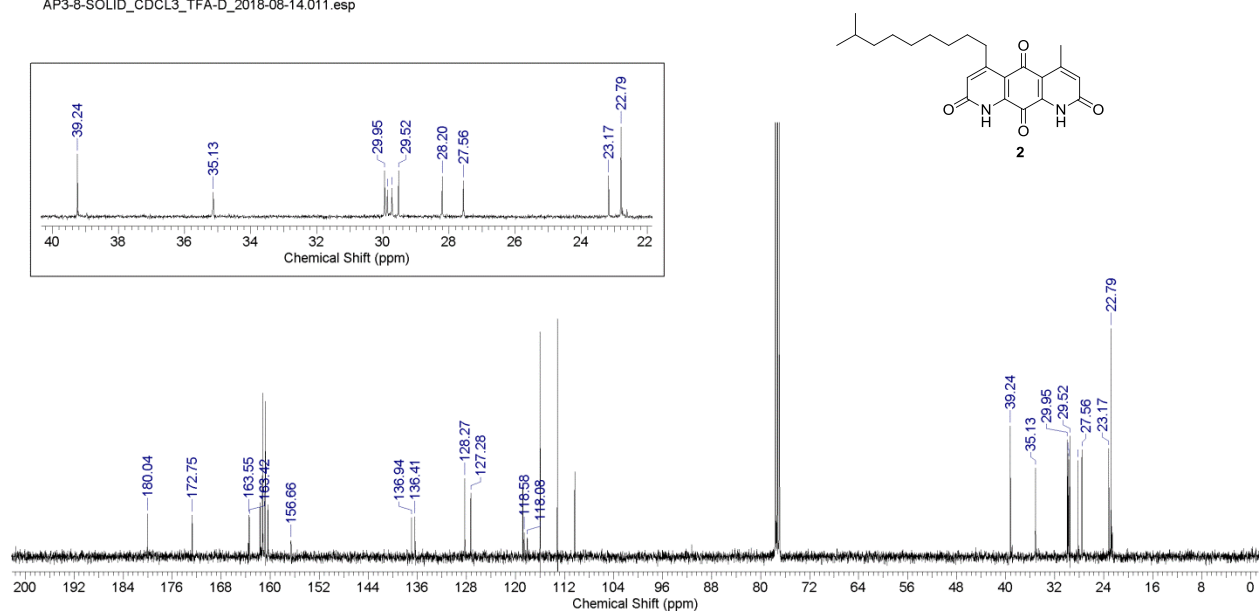

Zoomed  $^{13}\text{C}$  NMR regions of **2** in 2%  $\text{CF}_3\text{CO}_2\text{D}/\text{CDCl}_3$

AP3-8-SOLID\_CDCL3\_TFA-D\_2018-08-14.011.esp

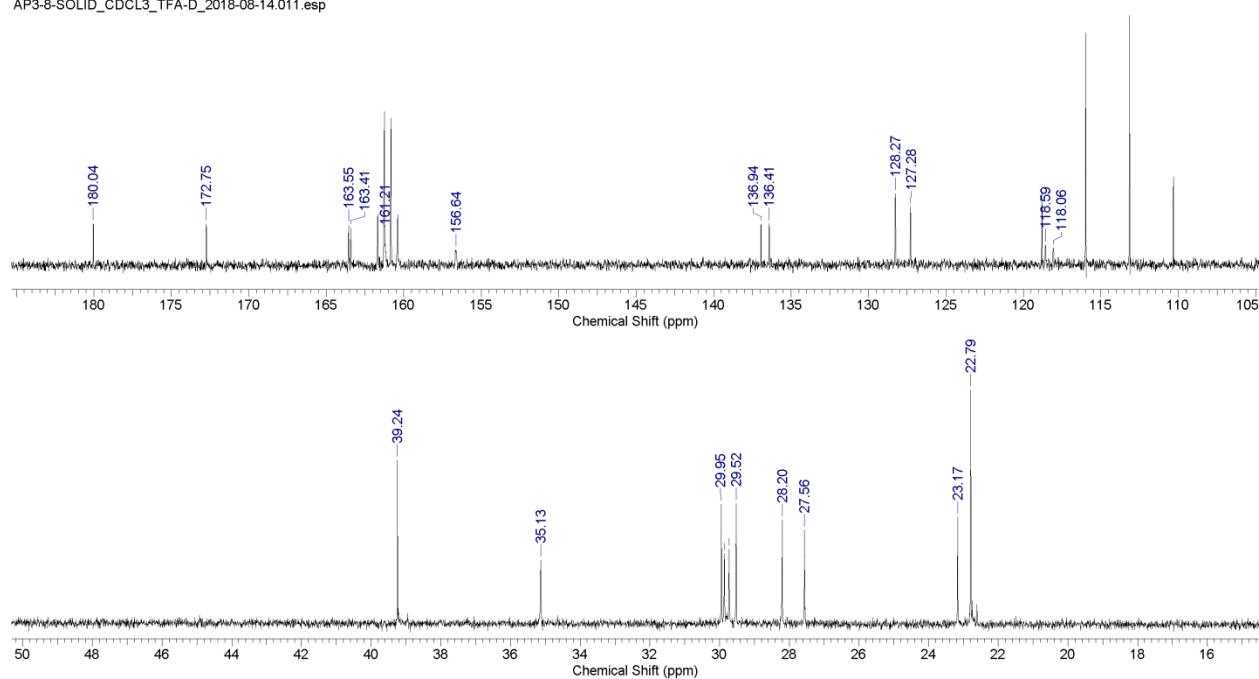

# DEPTQ of **2** in 2% CF<sub>3</sub>CO<sub>2</sub>D/CDCl<sub>3</sub>

AP3-8-SOLID\_CDCL3\_TFA-D\_2018-08-27.060.001.1r.esp

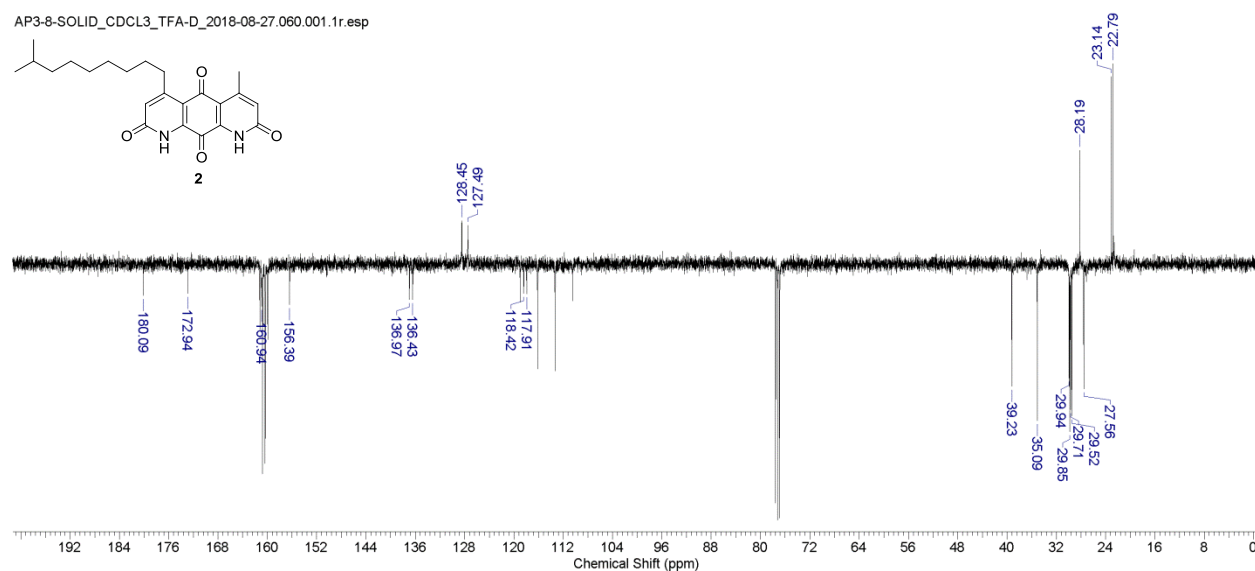

## Zoomed DEPTQ regions of **2** in 2% CF<sub>3</sub>CO<sub>2</sub>D/CDCl<sub>3</sub>

AP3-8-SOLID\_CDCL3\_TFA-D\_2018-08-27.060.001.1r.esp

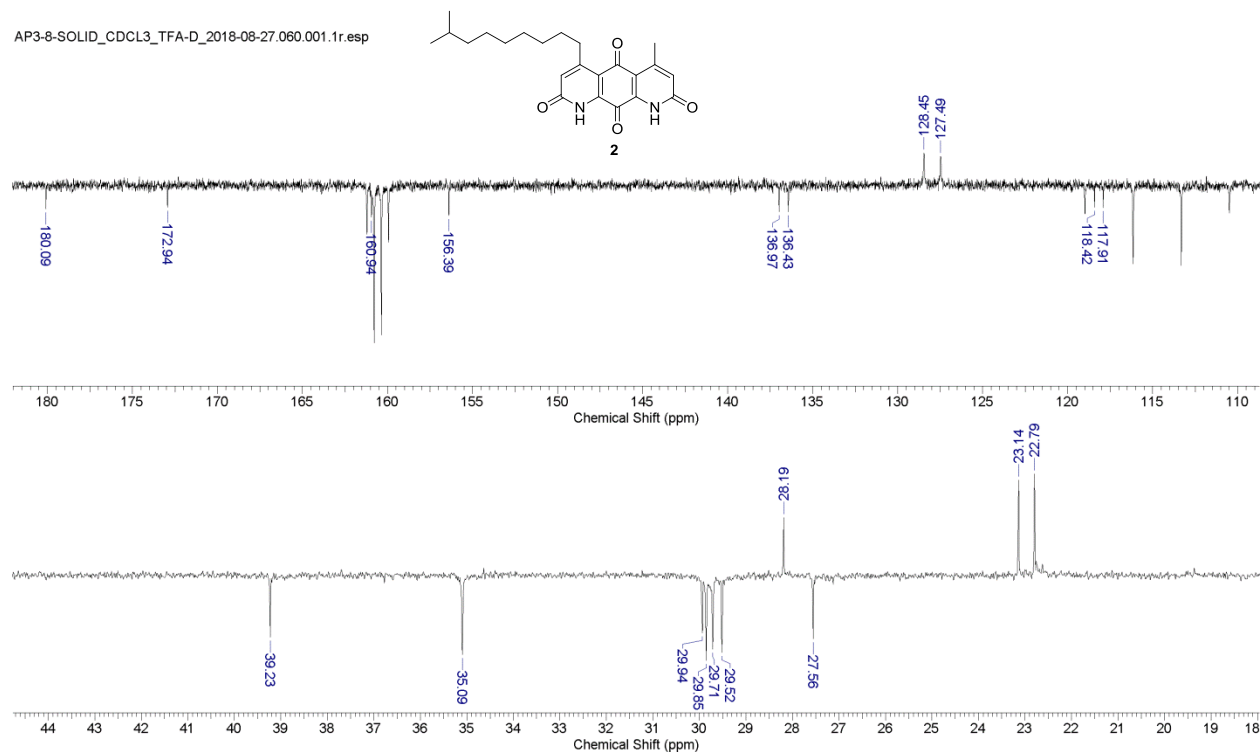

HMBC of **2** in 2% CF<sub>3</sub>CO<sub>2</sub>D/CDCl<sub>3</sub>

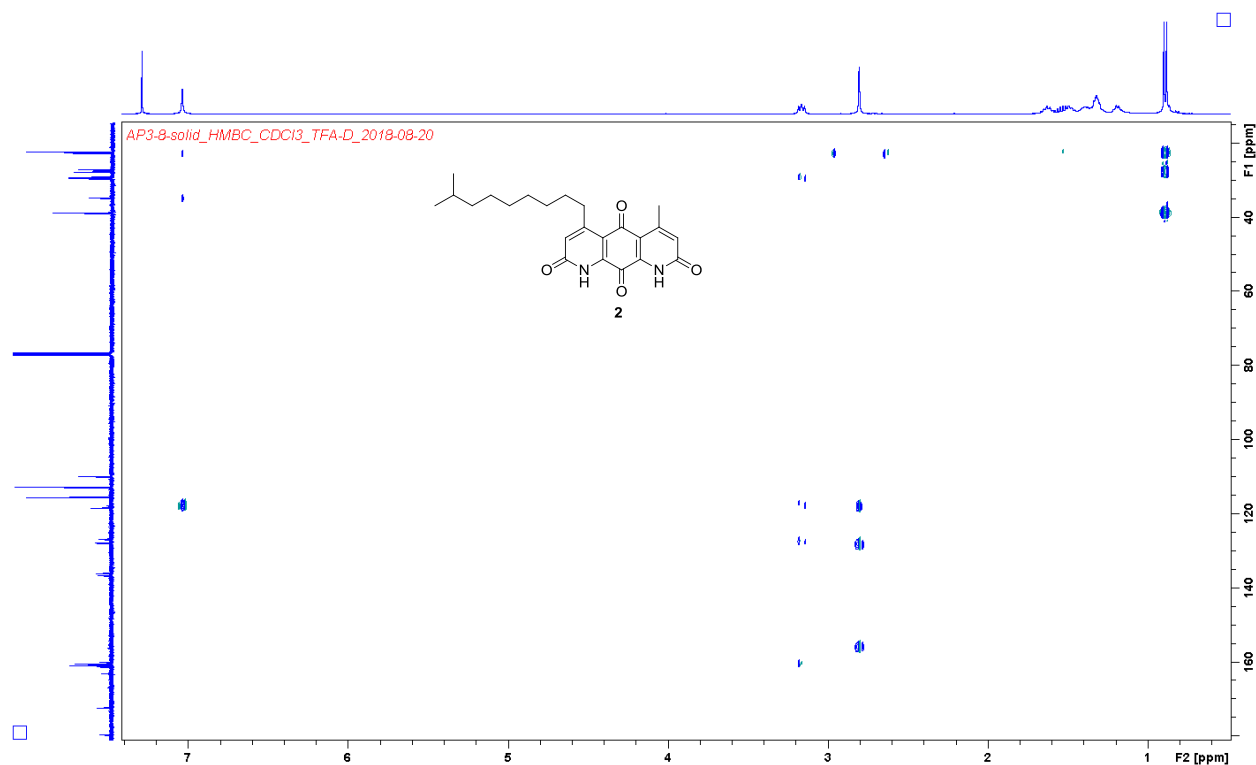

HSQC of **2** in 2% CF<sub>3</sub>CO<sub>2</sub>D/CDCl<sub>3</sub>

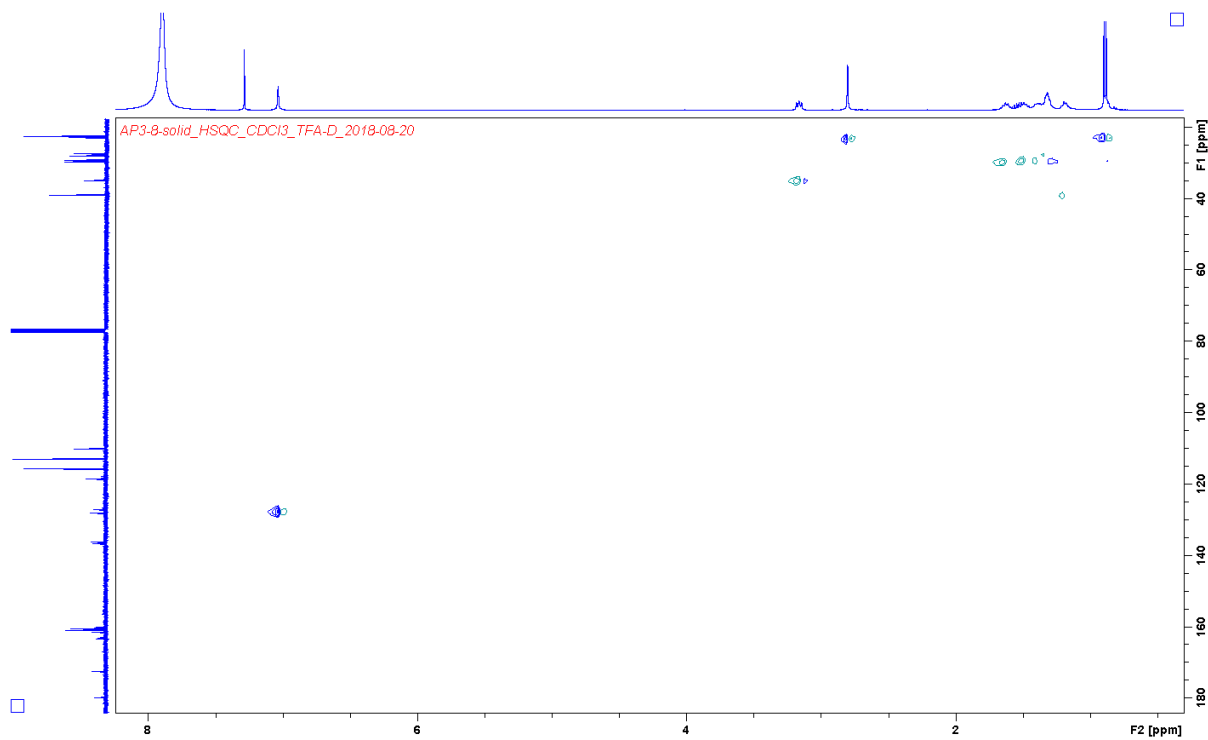

COSY of **2** in 2% CF<sub>3</sub>CO<sub>2</sub>D/CDCl<sub>3</sub>

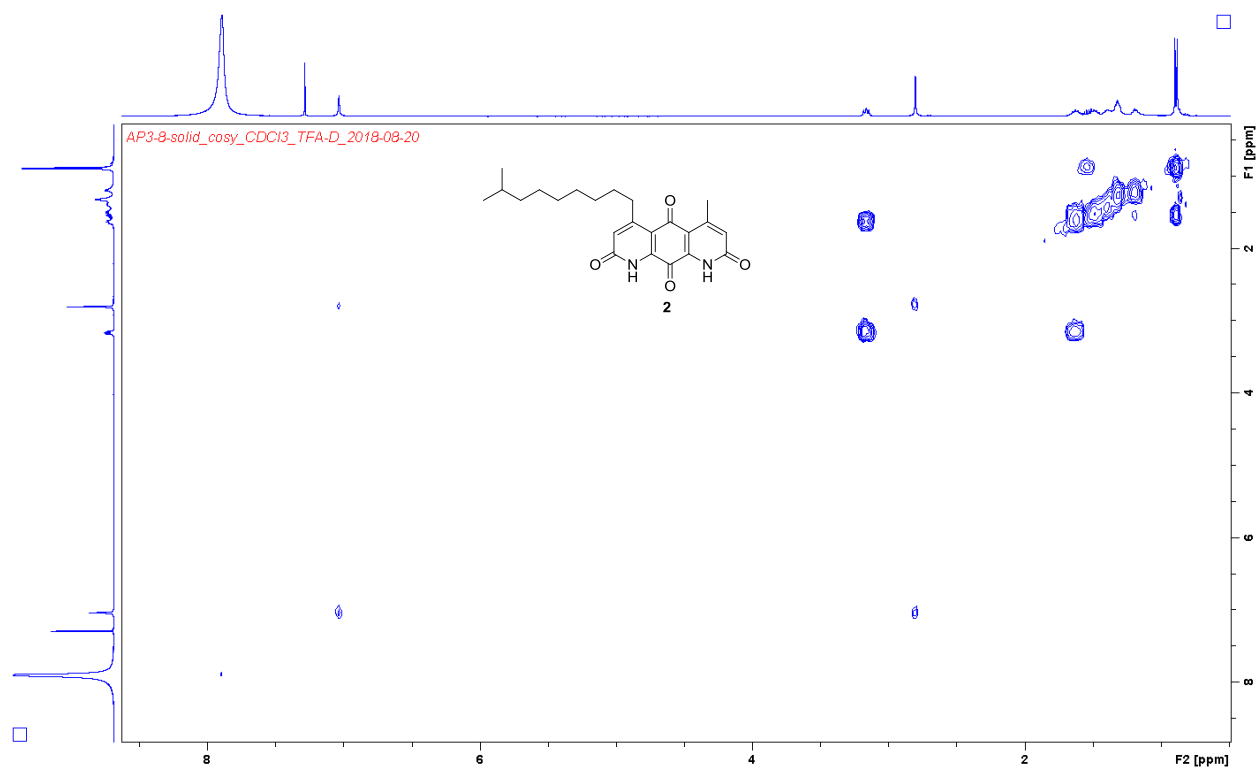

HRMS of **2**

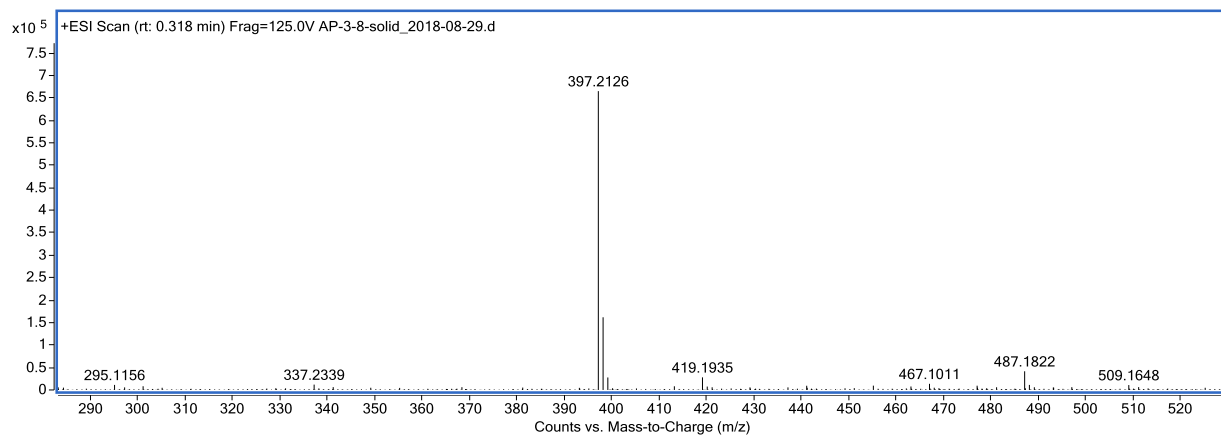

# HPLC chromatogram of 2

8/16/2018 13:47:19 1 / 1

## ==== Shimadzu LCsolution Analysis Report ====

Sample Name : C:\LabSolutions\LCsolution\Sun\Allan Book3\AP3-8-solid-final.lcd  
 Tray# : AP3-8-solid-final  
 Vail # : 1  
 Injection Volume : 28  
 Data File Name : 10 uL  
 Method File Name : AP3-8-solid-final.lcd  
 Batch File Name : SDQ gradient.lcm  
 Data Acquired : 8/14/2018 10:16:56 AM

### <Chromatogram>

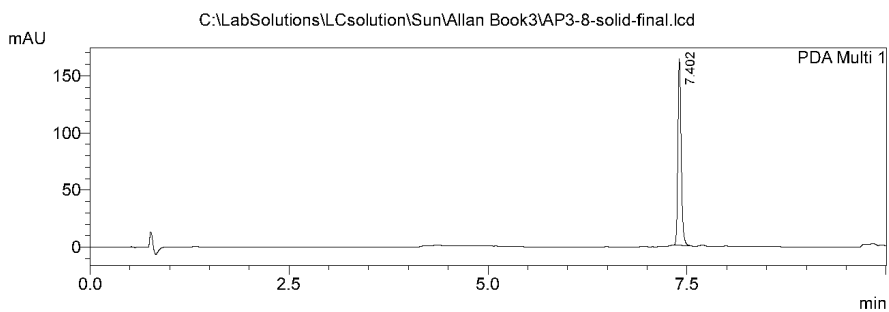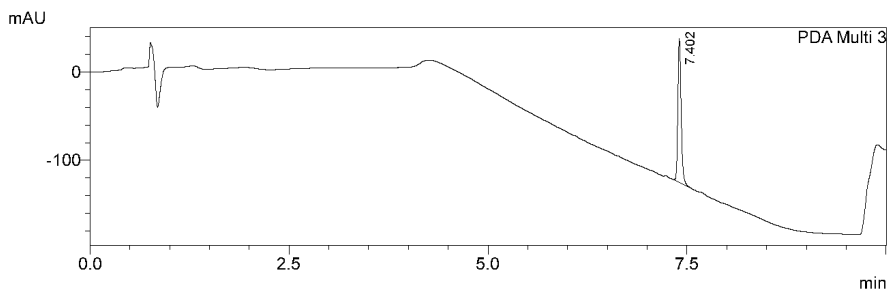

- 1 PDA Multi 1/254nm 4nm
- 2 PDA Multi 3/220nm 4nm

PeakTable

| PDA Ch1 254nm 4nm |           |        |        |         |          |
|-------------------|-----------|--------|--------|---------|----------|
| Peak#             | Ret. Time | Area   | Height | Area %  | Height % |
| 1                 | 7.402     | 460879 | 160511 | 100.000 | 100.000  |
| Total             |           | 460879 | 160511 | 100.000 | 100.000  |

PeakTable

| PDA Ch3 220nm 4nm |           |        |        |         |          |
|-------------------|-----------|--------|--------|---------|----------|
| Peak#             | Ret. Time | Area   | Height | Area %  | Height % |
| 1                 | 7.402     | 456057 | 162479 | 100.000 | 100.000  |
| Total             |           | 456057 | 162479 | 100.000 | 100.000  |

C:\LabSolutions\LCsolution\Sun\Allan Book3\AP3-8-solid-final.lcd

$^1\text{H}$  NMR of isomeric mixture of **1** in 1%  $\text{CF}_3\text{CO}_2\text{D}/\text{CDCl}_3$

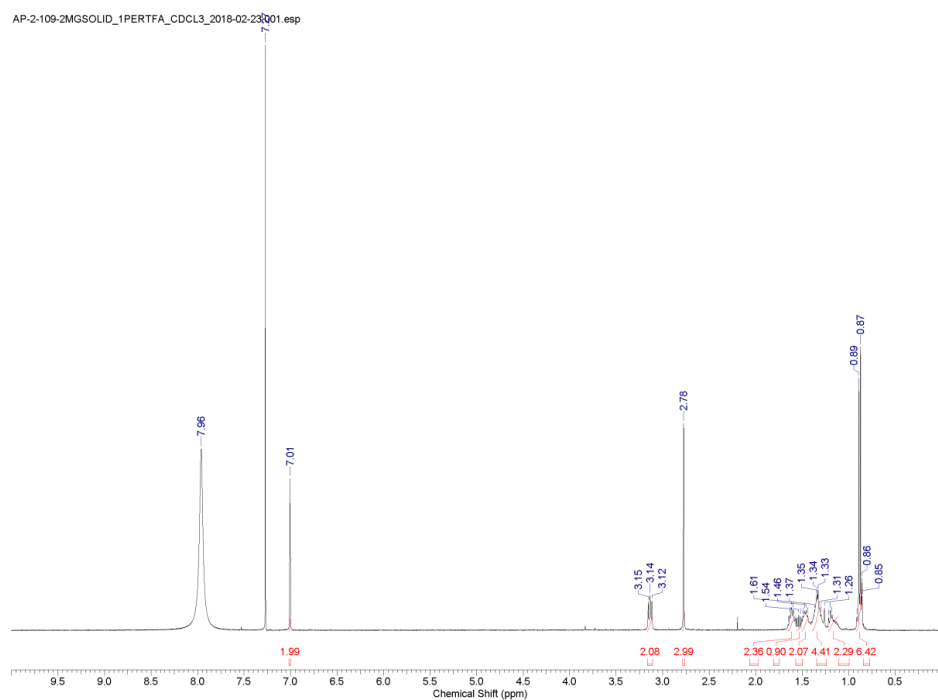

DEPTQ of isomeric mixture of **1** in 2%  $\text{CF}_3\text{CO}_2\text{D}/\text{CDCl}_3$

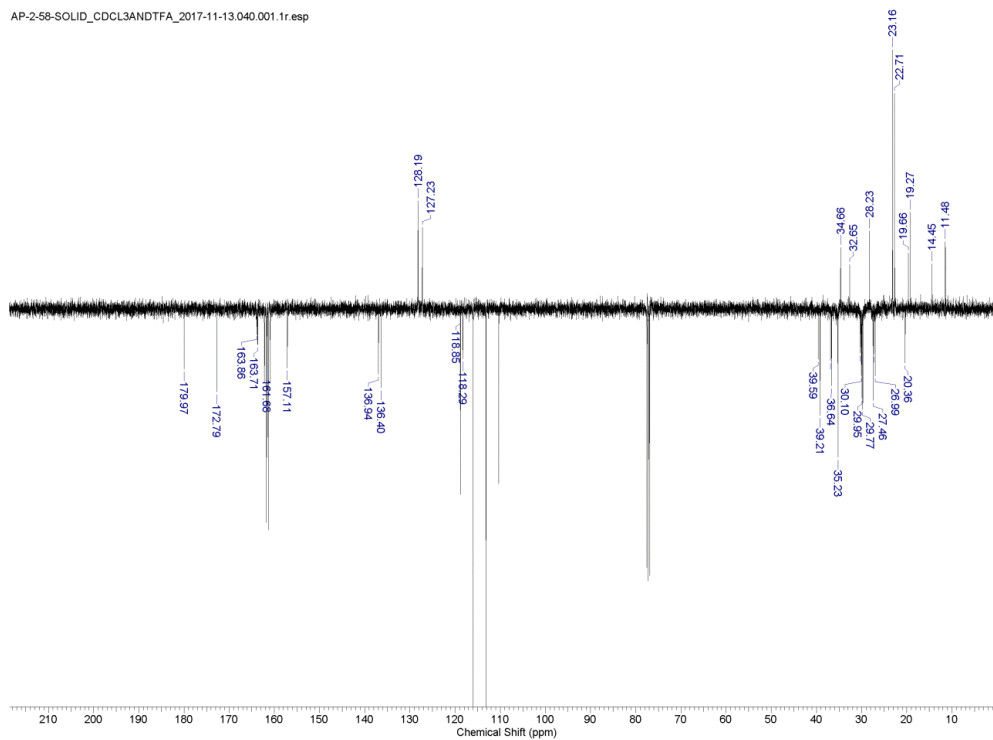

# HPLC chromatogram of isomeric mixture of 1

1/30/2018 15:59:53 1 / 1

## ==== Shimadzu LCsolution Analysis Report ====

Sample Name : C:\LabSolutions\LCsolution\Sun\Allan Book2\AP2-58-solid.lcd  
 Tray# : 1  
 Vial # : 29  
 Injection Volume : 10 uL  
 Data File Name : AP2-58-solid.lcd  
 Method File Name : SDQ gradient.lcm  
 Batch File Name :  
 Data Acquired : 10/30/2017 11:44:24 AM

### <Chromatogram>

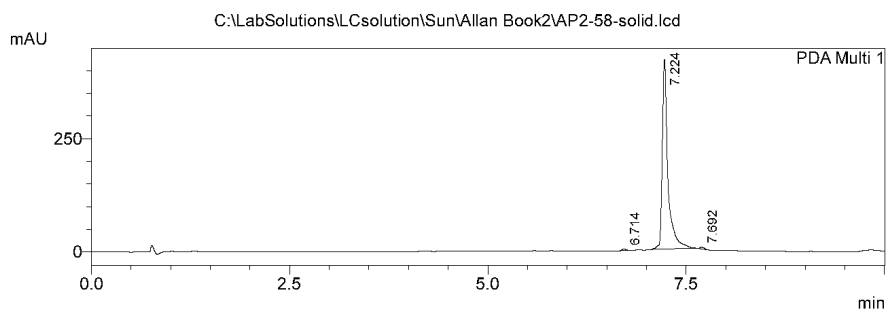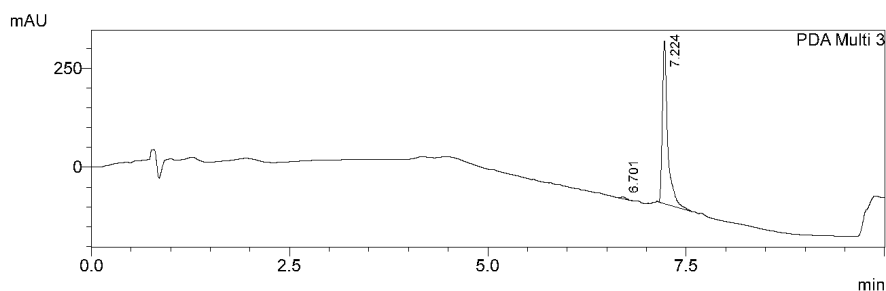

- 1 PDA Multi 1/254nm 4nm
- 2 PDA Multi 3/220nm 4nm

PeakTable

| PDA Ch1 254nm 4nm |           |         |        |         |          |
|-------------------|-----------|---------|--------|---------|----------|
| Peak#             | Ret. Time | Area    | Height | Area %  | Height % |
| 1                 | 6.714     | 14341   | 3874   | 0.687   | 0.922    |
| 2                 | 7.224     | 2060504 | 412745 | 98.726  | 98.239   |
| 3                 | 7.692     | 12257   | 3526   | 0.587   | 0.839    |
| Total             |           | 2087102 | 420145 | 100.000 | 100.000  |

PeakTable

| PDA Ch3 220nm 4nm |           |         |        |         |          |
|-------------------|-----------|---------|--------|---------|----------|
| Peak#             | Ret. Time | Area    | Height | Area %  | Height % |
| 1                 | 6.701     | 19557   | 4926   | 1.011   | 1.189    |
| 2                 | 7.224     | 1915543 | 409538 | 98.989  | 98.811   |
| Total             |           | 1935099 | 414464 | 100.000 | 100.000  |

C:\LabSolutions\LCsolution\Sun\Allan Book2\AP2-58-solid.lcd

$^1\text{H}$  NMR of isomeric mixture of **2** in 1%  $\text{CF}_3\text{CO}_2\text{D}/\text{CDCl}_3$

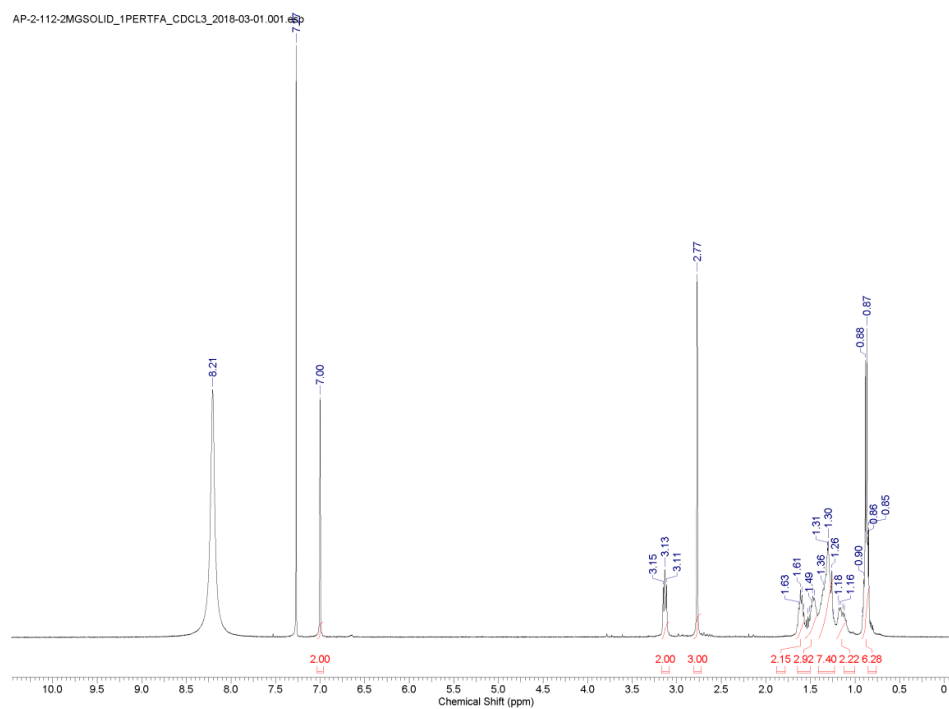

DEPTQ of isomeric mixture of **2** in 2%  $\text{CF}_3\text{CO}_2\text{D}/\text{CDCl}_3$

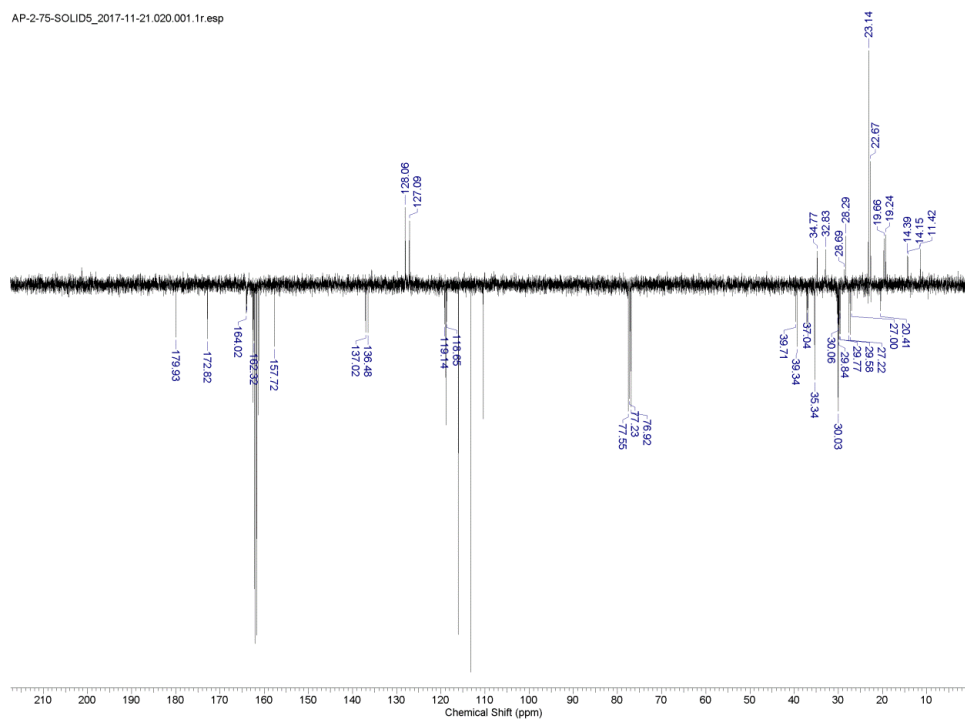

# HPLC chromatogram of isomeric mixture of 2

1/30/2018 16:03:26 1 / 1

## ==== Shimadzu LCsolution Analysis Report ====

Sample Name : C:\LabSolutions\LCsolution\Sun\Allan Book2\AP2-75-final.lcd  
 Tray# : 1  
 Vial # : 5  
 Injection Volume : 10 uL  
 Data File Name : AP2-75-final.lcd  
 Method File Name : SDQ gradient.lcm  
 Batch File Name :  
 Data Acquired : 11/21/2017 10:53:27 AM

### <Chromatogram>

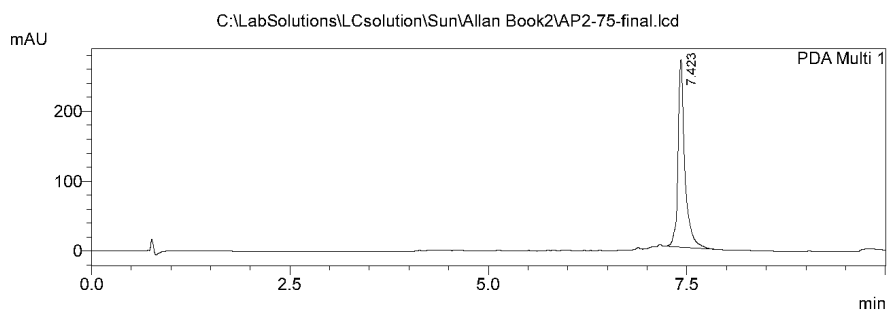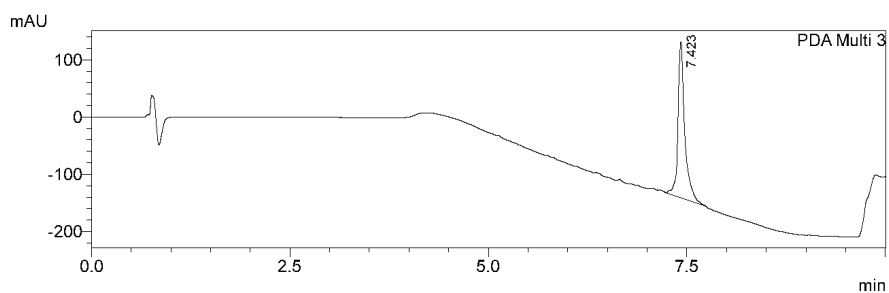

- 1 PDA Multi 1/254nm 4nm
- 2 PDA Multi 3/220nm 4nm

PeakTable

| PDA Ch1 254nm 4nm |           |         |        |         |          |
|-------------------|-----------|---------|--------|---------|----------|
| Peak#             | Ret. Time | Area    | Height | Area %  | Height % |
| 1                 | 7.423     | 1605067 | 266756 | 100.000 | 100.000  |
| Total             |           | 1605067 | 266756 | 100.000 | 100.000  |

PeakTable

| PDA Ch3 220nm 4nm |           |         |        |         |          |
|-------------------|-----------|---------|--------|---------|----------|
| Peak#             | Ret. Time | Area    | Height | Area %  | Height % |
| 1                 | 7.423     | 1610373 | 272185 | 100.000 | 100.000  |
| Total             |           | 1610373 | 272185 | 100.000 | 100.000  |

C:\LabSolutions\LCsolution\Sun\Allan Book2\AP2-75-final.lcd

# <sup>1</sup>H NMR of **3a** in DMSO-*d*<sub>6</sub>

AP-2-42-SOLID\_DMSO\_2017-10-20.001.esp

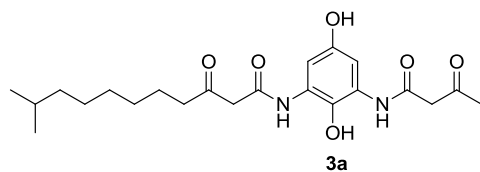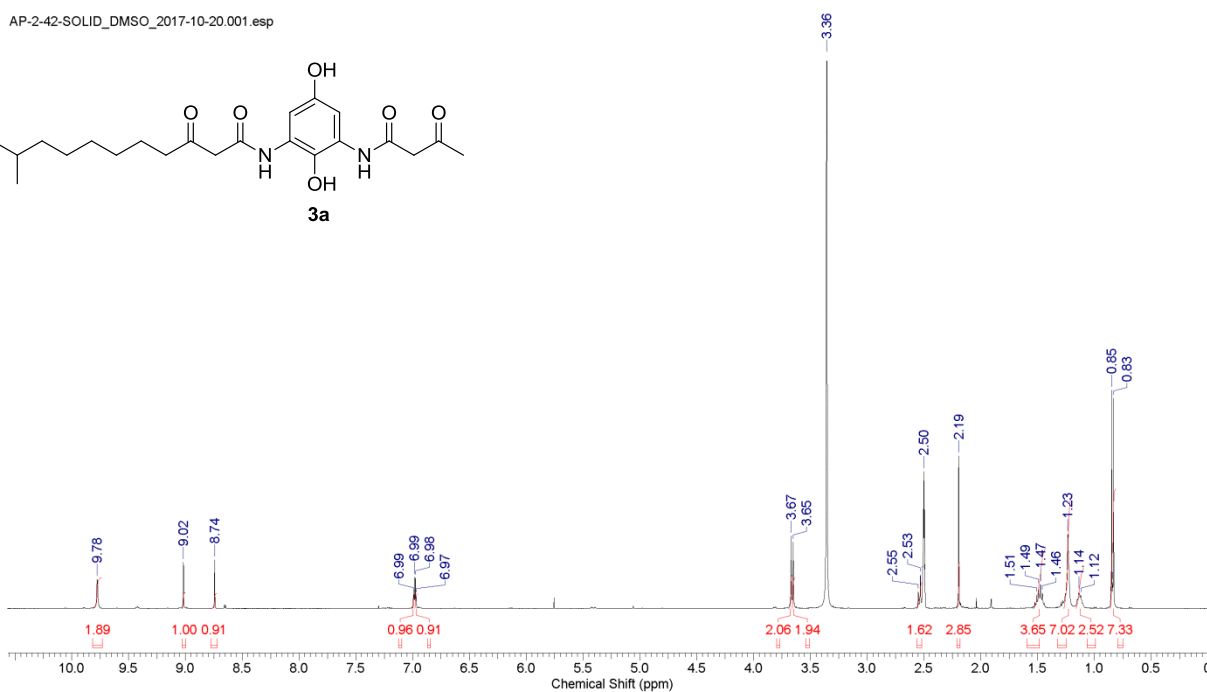

# <sup>13</sup>C NMR of **3a** in DMSO-*d*<sub>6</sub>

AP-2-42-SOLID\_DMSO\_2017-10-20.010.esp

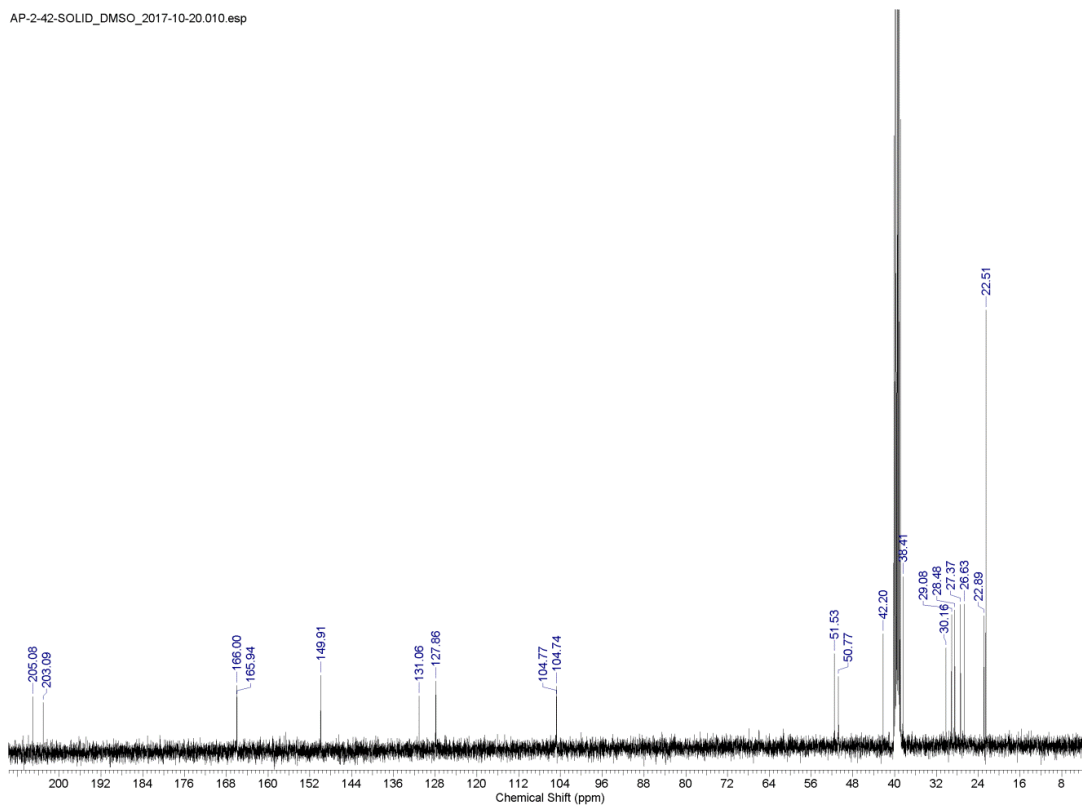

## ==== Shimadzu LCsolution Analysis Report ====

Sample Name : C:\LabSolutions\LCsolution\Sun\Allan Book2\AP2-42-solid.lcd  
Tray# : AP2-42-solid  
Vial # : 1  
Injection Volume : 5  
Data File Name : 10 uL  
Method File Name : AP2-42-solid.lcd  
Batch File Name : SDQ gradient.lcm  
Data Acquired : 10/19/2017 3:00:47 PM

## &lt;Chromatogram&gt;

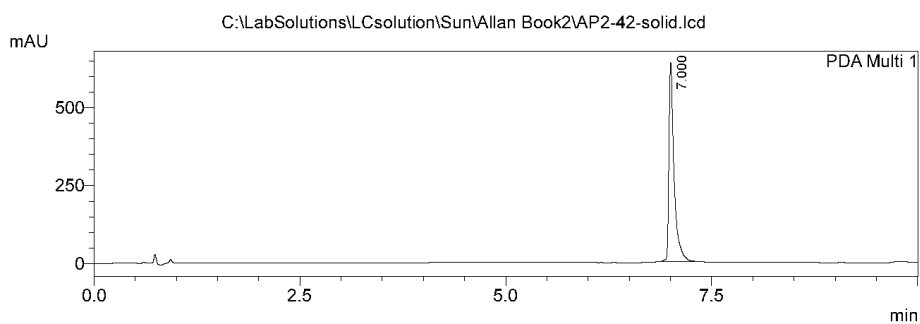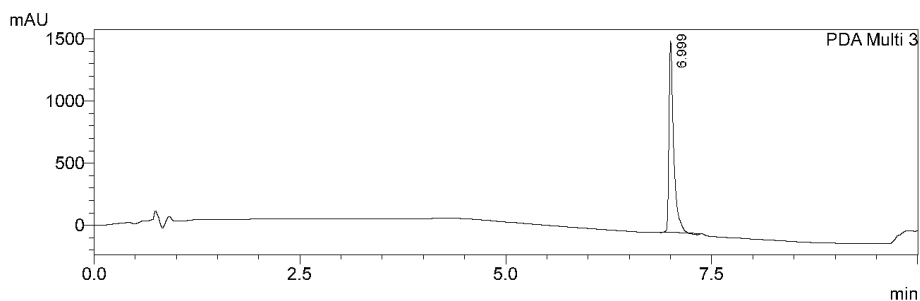

- 1 PDA Multi 1/254nm 4nm  
2 PDA Multi 3/220nm 4nm

PeakTable

PDA Ch1 254nm 4nm

| Peak# | Ret. Time | Area    | Height | Area %  | Height % |
|-------|-----------|---------|--------|---------|----------|
| 1     | 7.000     | 2764659 | 627841 | 100.000 | 100.000  |
| Total |           | 2764659 | 627841 | 100.000 | 100.000  |

PeakTable

PDA Ch3 220nm 4nm

| Peak# | Ret. Time | Area    | Height  | Area %  | Height % |
|-------|-----------|---------|---------|---------|----------|
| 1     | 6.999     | 5979700 | 1537220 | 100.000 | 100.000  |
| Total |           | 5979700 | 1537220 | 100.000 | 100.000  |

C:\LabSolutions\LCsolution\Sun\Allan Book2\AP2-42-solid.lcd

$^1\text{H}$  NMR of **3b** in  $\text{DMSO}-d_6$

AP-2-73-SOLID\_DMSO\_2017-11-24.001.esp

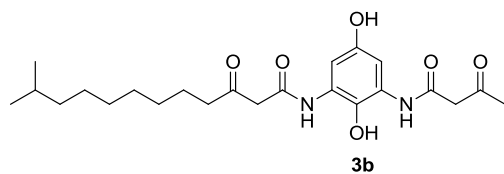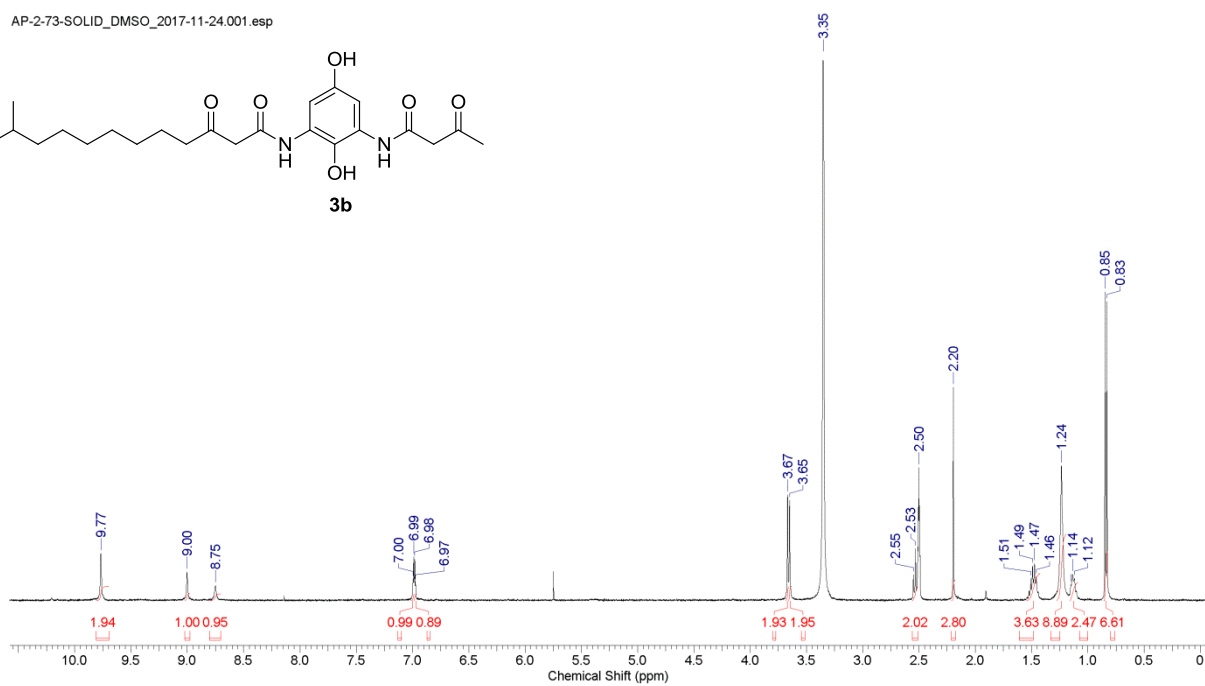

$^{13}\text{C}$  NMR of **3b** in  $\text{DMSO}-d_6$

AP-2-73-SOLID\_DMSO\_2017-11-24.011.esp

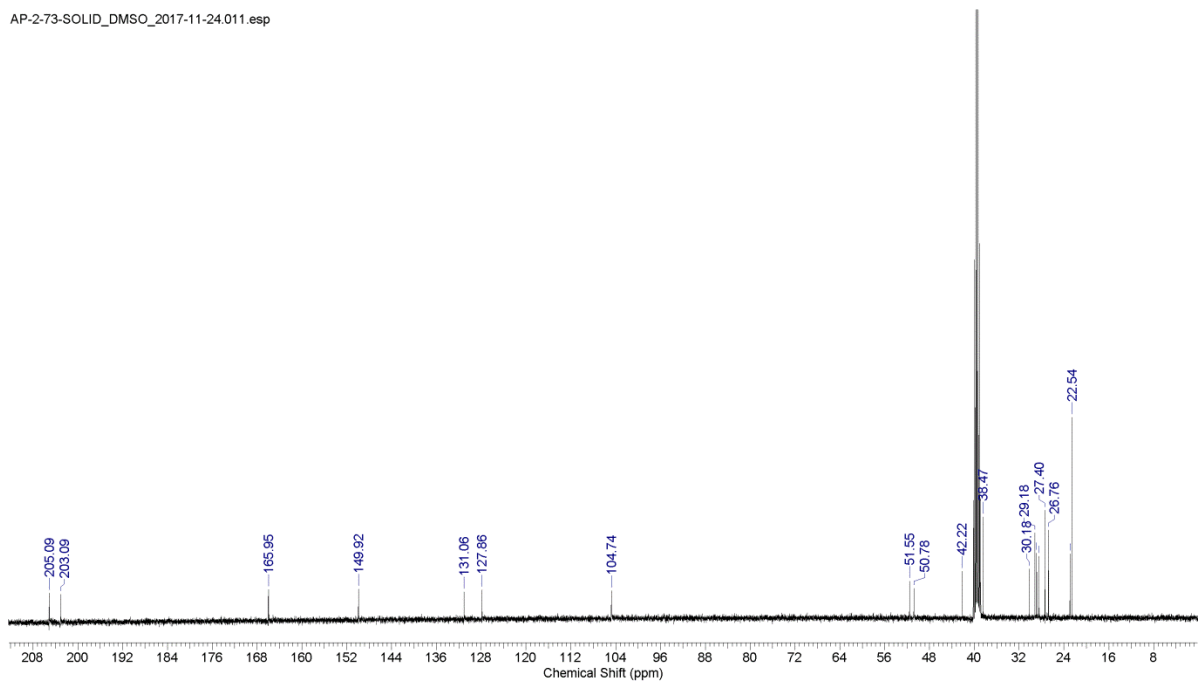

Zoomed  $^{13}\text{C}$  NMR region of **3b** in  $\text{DMSO-}d_6$

AP-2-73-SOLID\_DMSO\_2017-11-24.011.esp

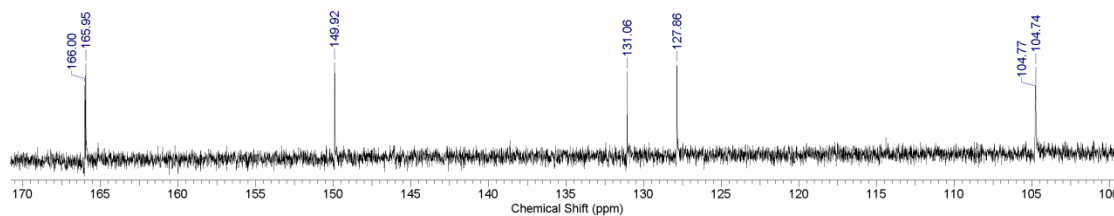

# HPLC chromatogram of 3b

1/30/2018 16:05:31 1 / 1

## ==== Shimadzu LCsolution Analysis Report ====

Sample Name : C:\LabSolutions\LCsolution\Sun\Allan Book2\AP2-73-solid3.lcd  
 Tray# : AP2-73-solid3  
 Vial # : 1  
 Injection Volume : 4  
 Data File Name : 10 uL  
 Method File Name : AP2-73-solid3.lcd  
 Batch File Name : SDQ gradient.lcm  
 Data Acquired : 11/15/2017 5:48:03 PM

### <Chromatogram>

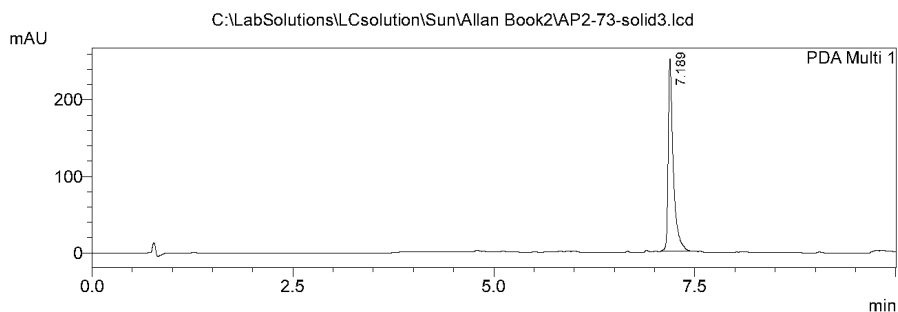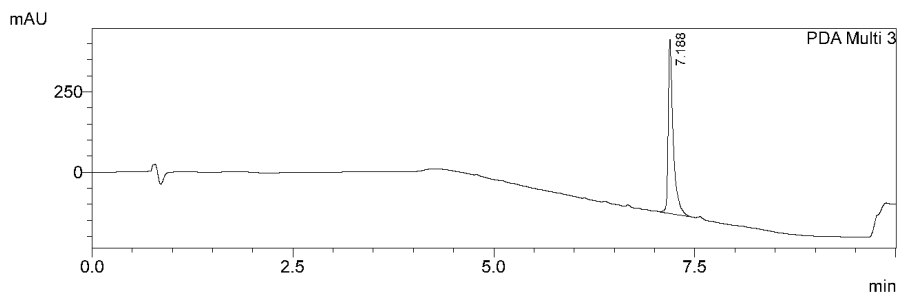

- 1 PDA Multi 1/254nm 4nm
- 2 PDA Multi 3/220nm 4nm

PeakTable

PDA Ch1 254nm 4nm

| Peak# | Ret. Time | Area    | Height | Area %  | Height % |
|-------|-----------|---------|--------|---------|----------|
| 1     | 7.189     | 1093894 | 250366 | 100.000 | 100.000  |
| Total |           | 1093894 | 250366 | 100.000 | 100.000  |

PeakTable

PDA Ch3 220nm 4nm

| Peak# | Ret. Time | Area    | Height | Area %  | Height % |
|-------|-----------|---------|--------|---------|----------|
| 1     | 7.188     | 2309138 | 540481 | 100.000 | 100.000  |
| Total |           | 2309138 | 540481 | 100.000 | 100.000  |

C:\LabSolutions\LCsolution\Sun\Allan Book2\AP2-73-solid3.lcd

# <sup>1</sup>H NMR of **3c** in DMSO-*d*<sub>6</sub>

AP-2-24-SOLID\_DMSO\_2017-09-10.001.esp

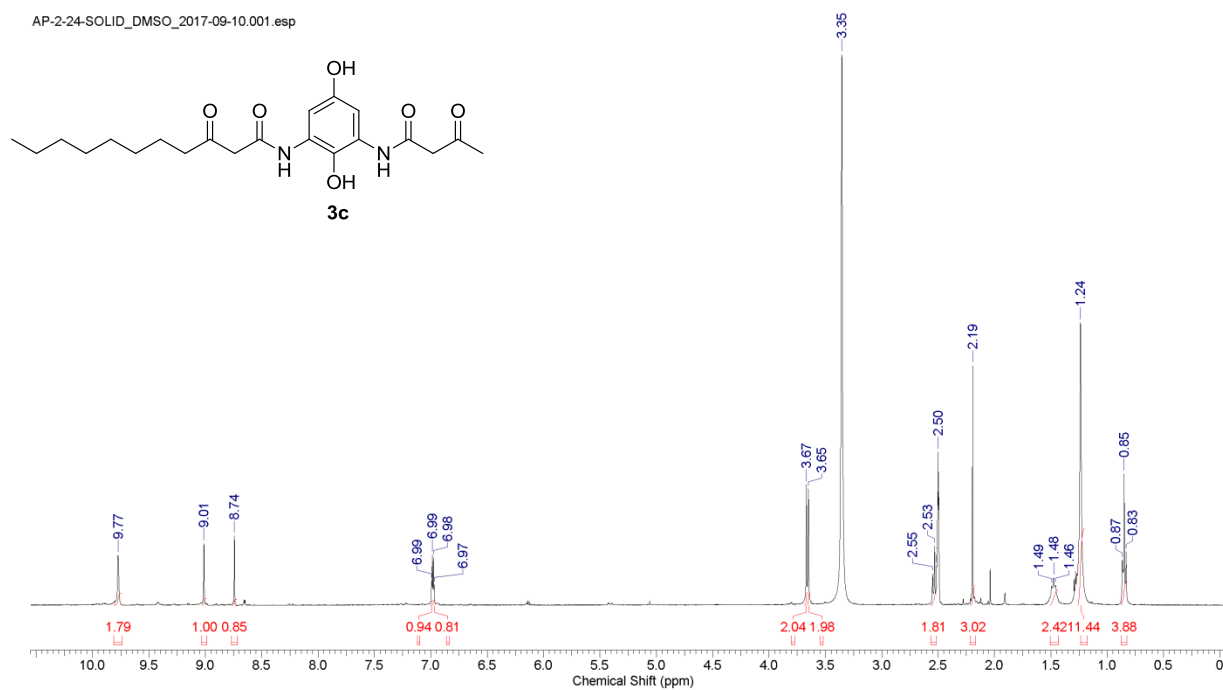

# <sup>13</sup>C NMR of **3c** in DMSO-*d*<sub>6</sub>

AP-2-24-SOLID\_DMSO\_2017-09-10.011.esp

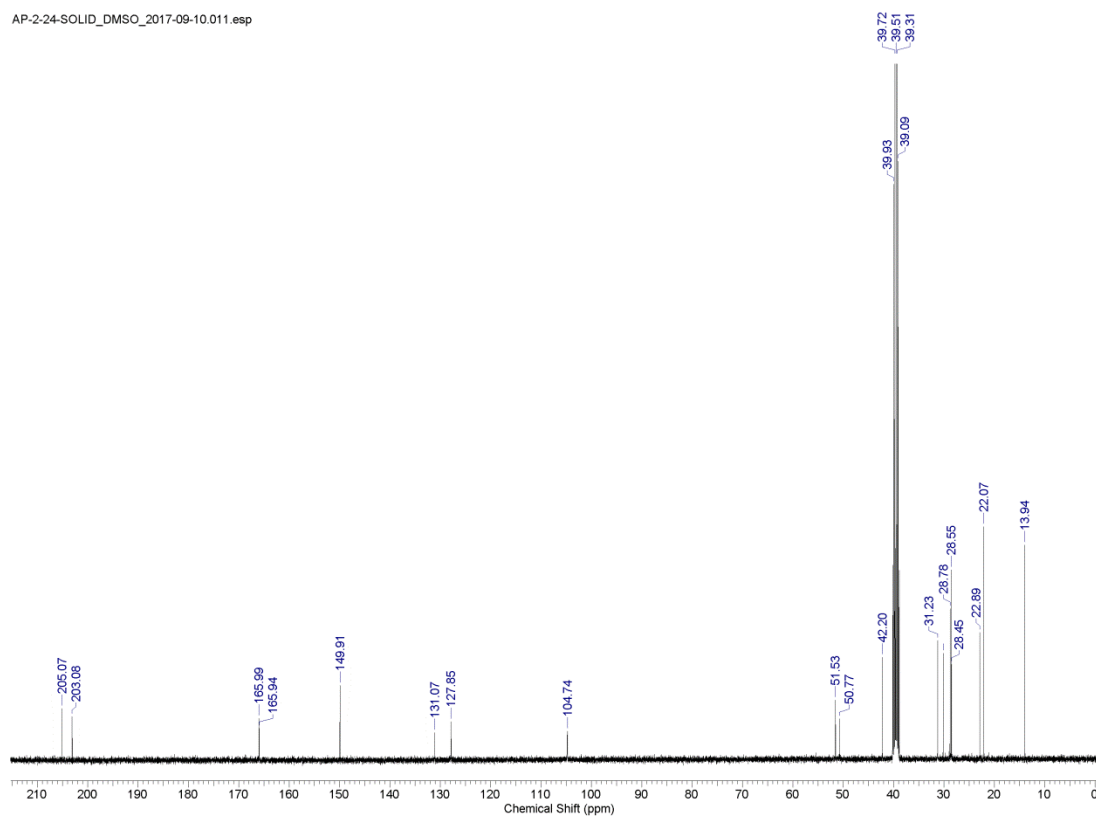

Zoomed  $^{13}\text{C}$  NMR region of **3c** in  $\text{DMSO-}d_6$

AP-2-24-SOLID\_DMSO\_2017-09-10.011.esp

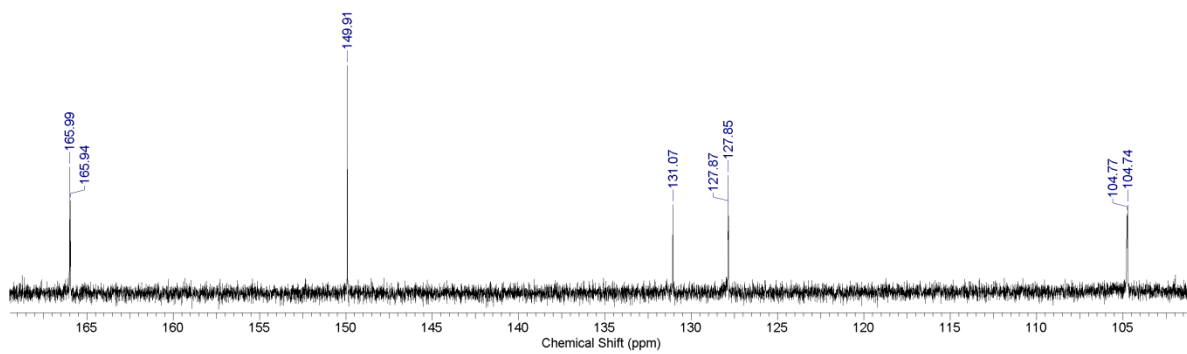

## ==== Shimadzu LCsolution Analysis Report ====

Sample Name : C:\LabSolutions\LCsolution\Sun\Allan Book2\AP2-32-final.lcd  
Tray# : AP2-32-final  
Vial # : 1  
Injection Volume : 7  
Data File Name : 10 uL  
Method File Name : AP2-32-final.lcd  
Batch File Name : SDQ gradient.lcm  
Data Acquired : 10/6/2017 2:04:43 PM

## &lt;Chromatogram&gt;

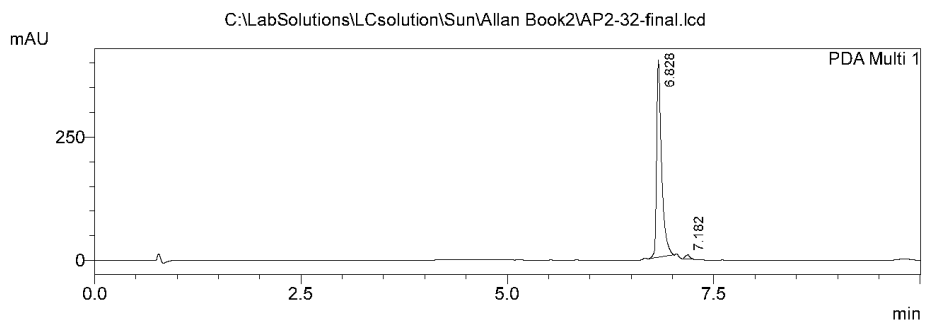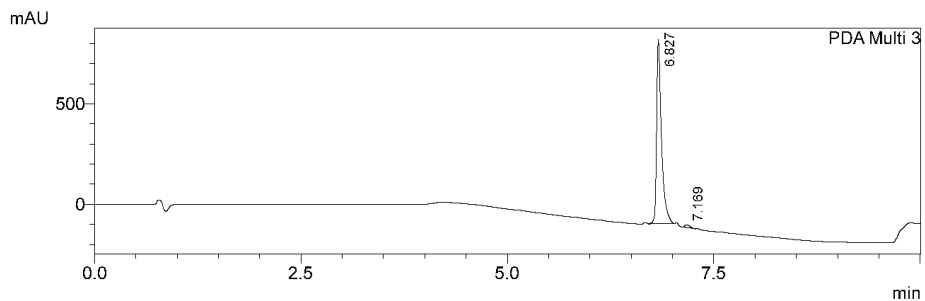

- 1 PDA Multi 1/254nm 4nm  
2 PDA Multi 3/220nm 4nm

PeakTable

PDA Ch1 254nm 4nm

| Peak# | Ret. Time | Area    | Height | Area %  | Height % |
|-------|-----------|---------|--------|---------|----------|
| 1     | 6.828     | 1674093 | 397679 | 98.300  | 97.997   |
| 2     | 7.182     | 28956   | 8128   | 1.700   | 2.003    |
| Total |           | 1703049 | 405807 | 100.000 | 100.000  |

PeakTable

PDA Ch3 220nm 4nm

| Peak# | Ret. Time | Area    | Height | Area %  | Height % |
|-------|-----------|---------|--------|---------|----------|
| 1     | 6.827     | 3727835 | 916367 | 98.538  | 98.634   |
| 2     | 7.169     | 55328   | 12695  | 1.462   | 1.366    |
| Total |           | 3783164 | 929062 | 100.000 | 100.000  |

<sup>1</sup>H NMR of **4a** in CDCl<sub>3</sub>

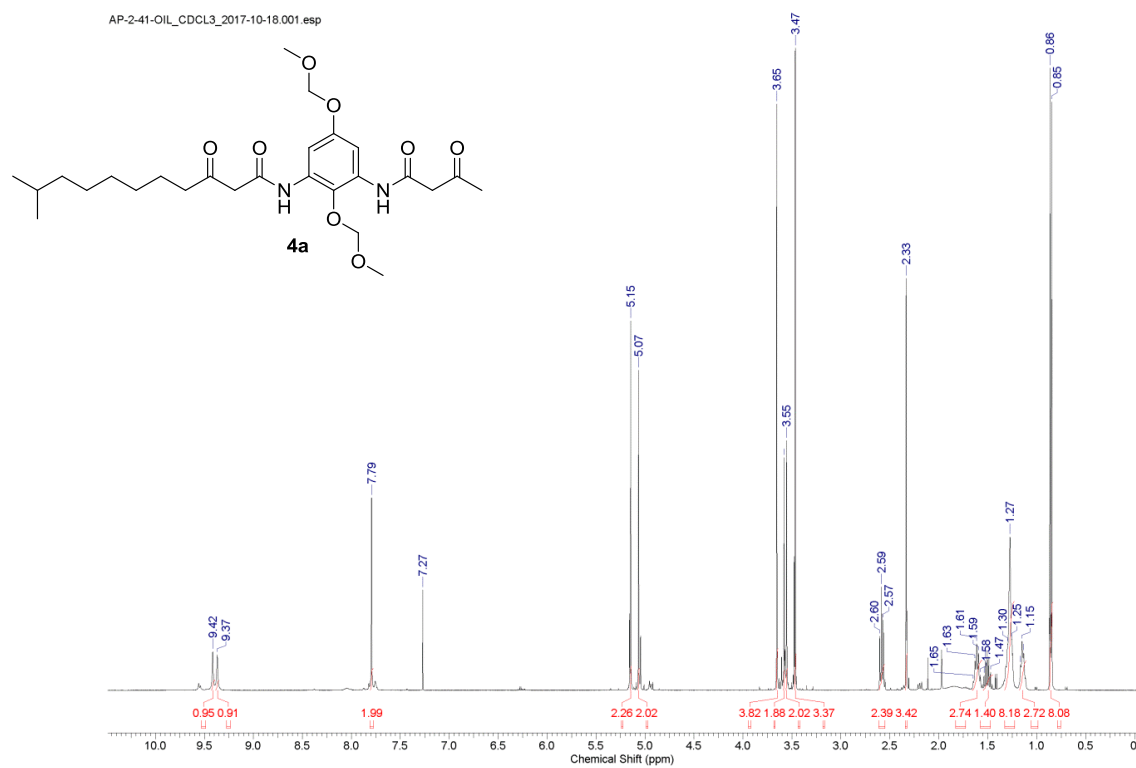

<sup>13</sup>C NMR of **4a** in CDCl<sub>3</sub>

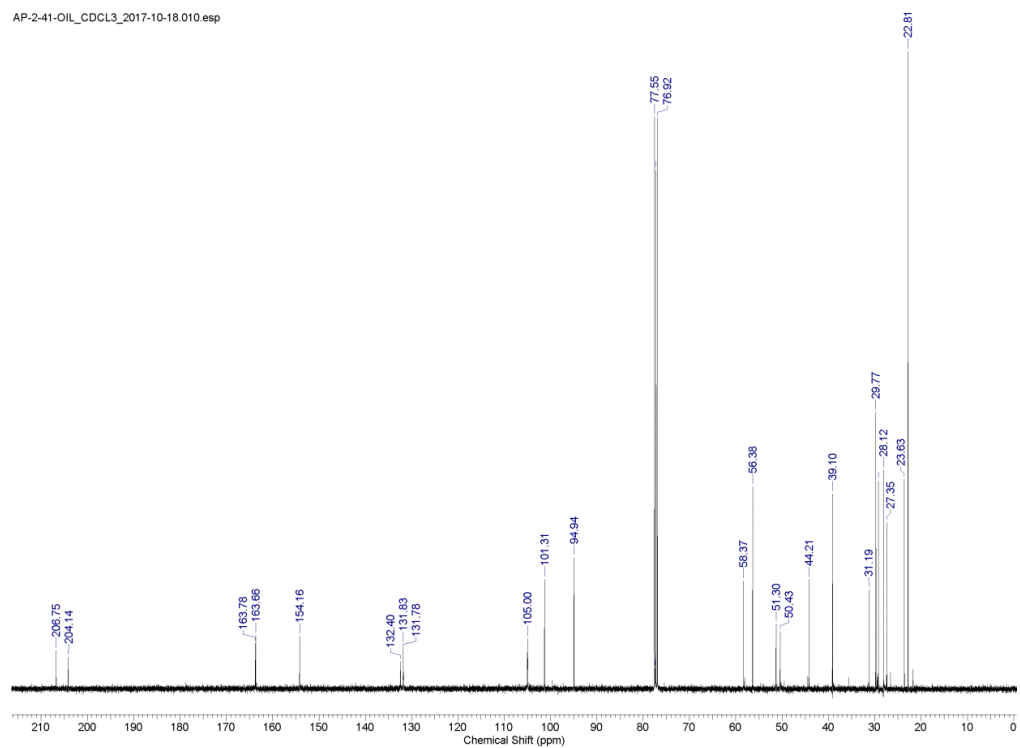

# HPLC chromatogram of 4a

1/30/2018 16:06:11 1 / 1

## ==== Shimadzu LCsolution Analysis Report ====

Sample Name : C:\LabSolutions\LCsolution\Sun\Allan Book2\AP2-41-final.lcd  
 Tray# : AP2-41-final  
 Vial # : 1  
 Injection Volume : 2  
 Data File Name : 10 uL  
 Method File Name : AP2-41-final.lcd  
 Batch File Name : SDQ gradient.lcm  
 Data Acquired : 10/18/2017 2:08:52 PM

### <Chromatogram>

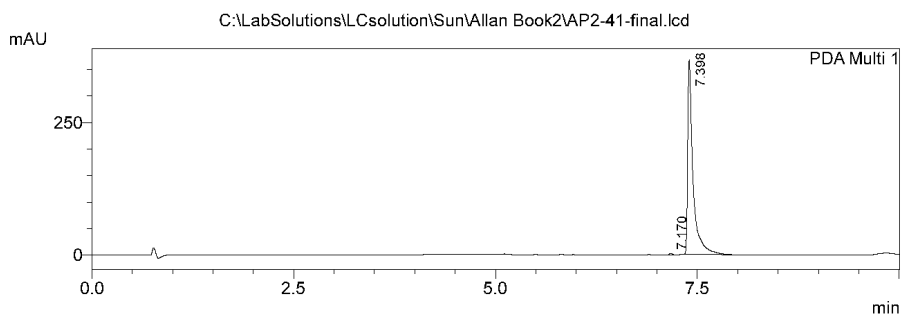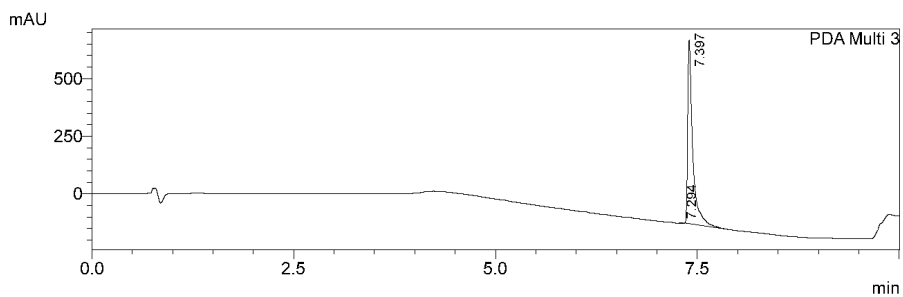

- 1 PDA Multi 1/254nm 4nm
- 2 PDA Multi 3/220nm 4nm

#### PeakTable

PDA Ch1 254nm 4nm

| Peak# | Ret. Time | Area    | Height | Area %  | Height % |
|-------|-----------|---------|--------|---------|----------|
| 1     | 7.170     | 7066    | 2700   | 0.421   | 0.737    |
| 2     | 7.398     | 1670190 | 363779 | 99.579  | 99.263   |
| Total |           | 1677256 | 366479 | 100.000 | 100.000  |

#### PeakTable

PDA Ch3 220nm 4nm

| Peak# | Ret. Time | Area    | Height | Area %  | Height % |
|-------|-----------|---------|--------|---------|----------|
| 1     | 7.294     | 8244    | 3492   | 0.241   | 0.437    |
| 2     | 7.397     | 3405385 | 795190 | 99.759  | 99.563   |
| Total |           | 3413629 | 798682 | 100.000 | 100.000  |

C:\LabSolutions\LCsolution\Sun\Allan Book2\AP2-41-final.lcd

$^1\text{H}$  NMR of **4b** in  $\text{CDCl}_3$

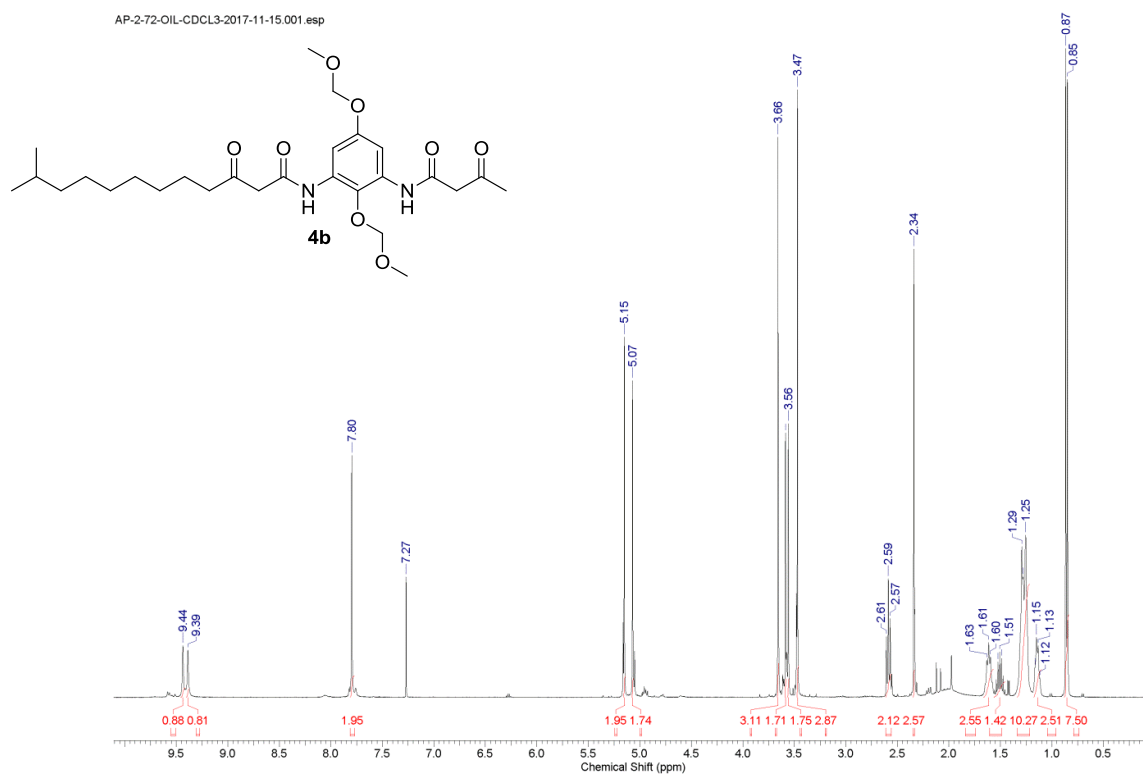

$^{13}\text{C}$  NMR of **4b** in  $\text{CDCl}_3$

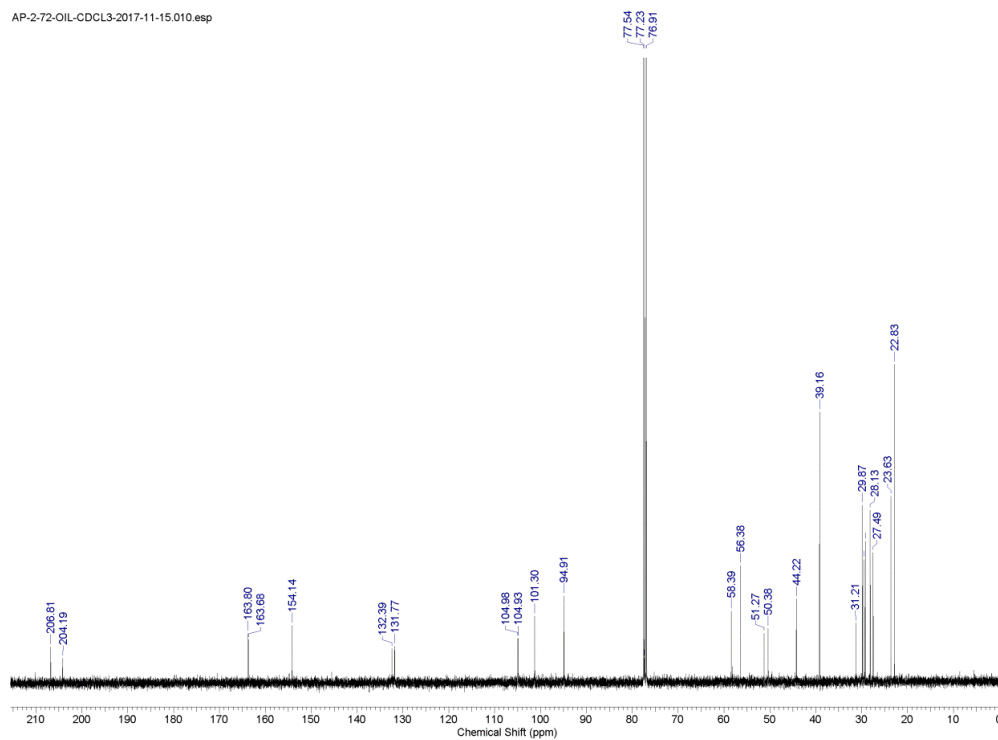

# HPLC chromatogram of 4b

1/30/2018 16:07:31 1 / 1

## ==== Shimadzu LCsolution Analysis Report ====

Sample Name : C:\LabSolutions\LCsolution\Sun\Allan Book2\AP2-72-final.lcd  
 Tray# : AP2-72-final  
 Vial # : 1  
 Injection Volume : 3  
 Data File Name : 10 uL  
 Method File Name : AP2-72-final.lcd  
 Batch File Name : SDQ gradient.lcm  
 Data Acquired : 11/14/2017 5:30:47 PM

### <Chromatogram>

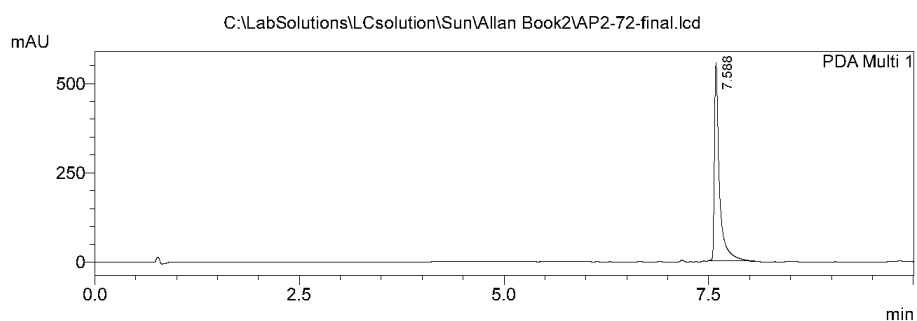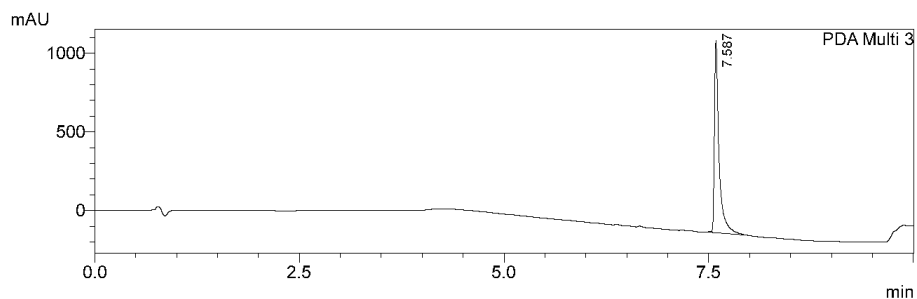

- 1 PDA Multi 1/254nm 4nm
- 2 PDA Multi 3/220nm 4nm

PeakTable

| PDA Ch1 254nm 4nm |           |         |        |         |          |
|-------------------|-----------|---------|--------|---------|----------|
| Peak#             | Ret. Time | Area    | Height | Area %  | Height % |
| 1                 | 7.588     | 2348682 | 552430 | 100.000 | 100.000  |
| Total             |           | 2348682 | 552430 | 100.000 | 100.000  |

PeakTable

| PDA Ch3 220nm 4nm |           |         |         |         |          |
|-------------------|-----------|---------|---------|---------|----------|
| Peak#             | Ret. Time | Area    | Height  | Area %  | Height % |
| 1                 | 7.587     | 4775447 | 1222038 | 100.000 | 100.000  |
| Total             |           | 4775447 | 1222038 | 100.000 | 100.000  |

C:\LabSolutions\LCsolution\Sun\Allan Book2\AP2-72-final.lcd

$^1\text{H}$  NMR of **5a** in  $\text{CDCl}_3$

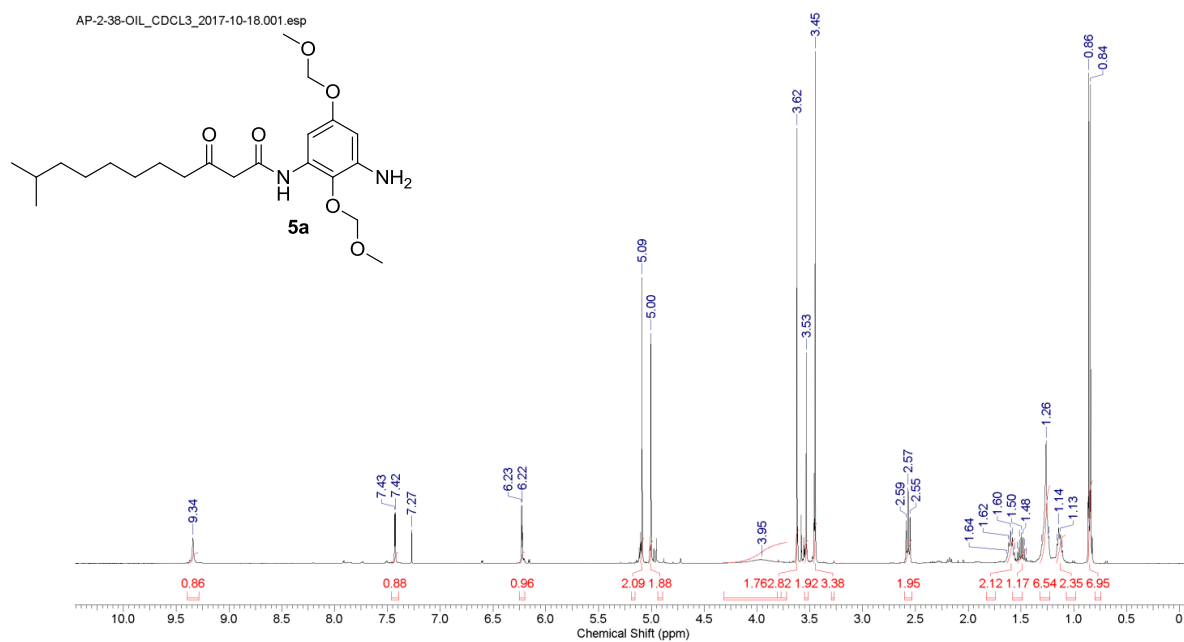

$^{13}\text{C}$  NMR of **5a** in  $\text{CDCl}_3$

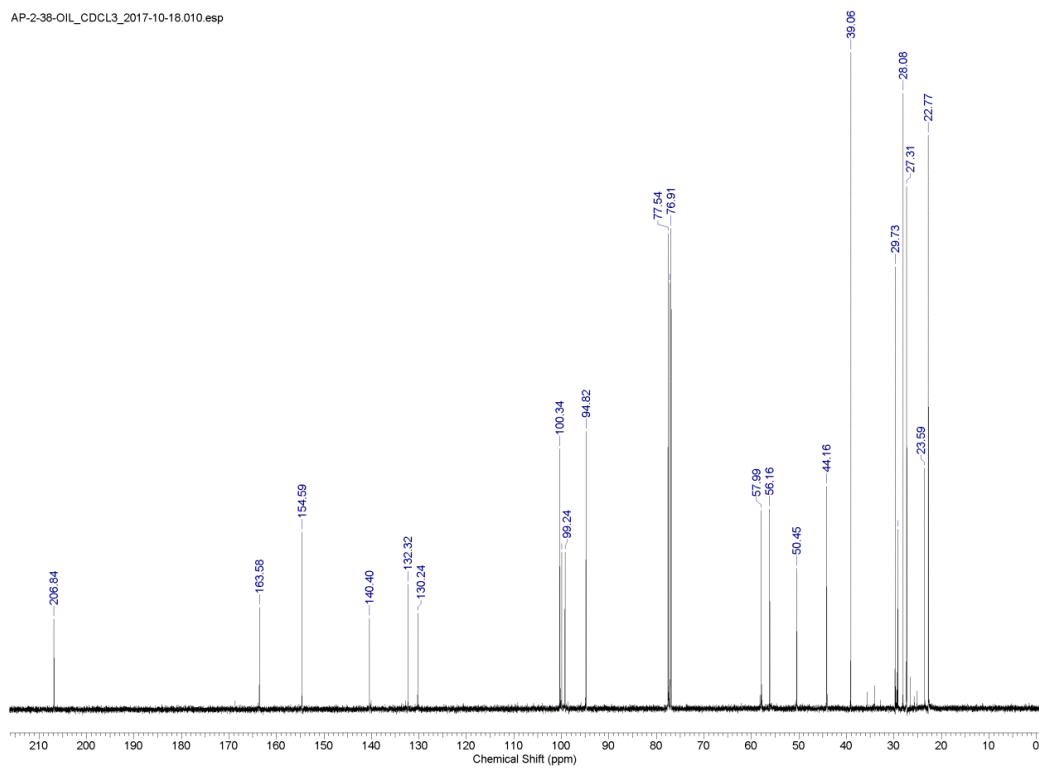

## ==== Shimadzu LCsolution Analysis Report ====

Sample Name : C:\LabSolutions\LCsolution\Sun\Allan Book2\AP2-38-final.lcd  
Tray# : AP2-38-final  
Vial # : 1  
Injection Volume : 2  
Data File Name : 10 uL  
Method File Name : AP2-38-final.lcd  
Batch File Name : SDQ gradient.lcm  
Data Acquired : 10/17/2017 10:45:28 AM

## &lt;Chromatogram&gt;

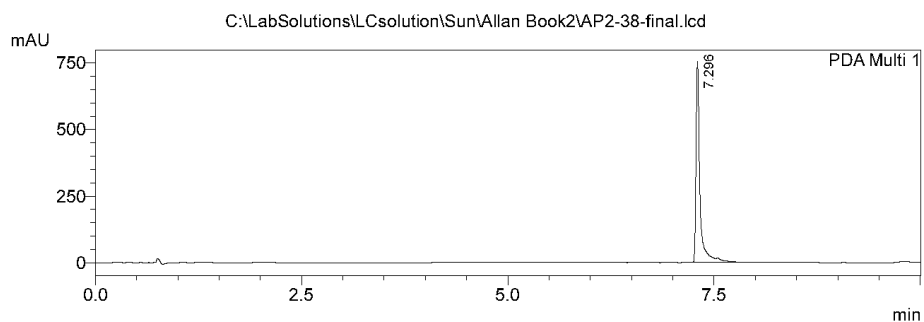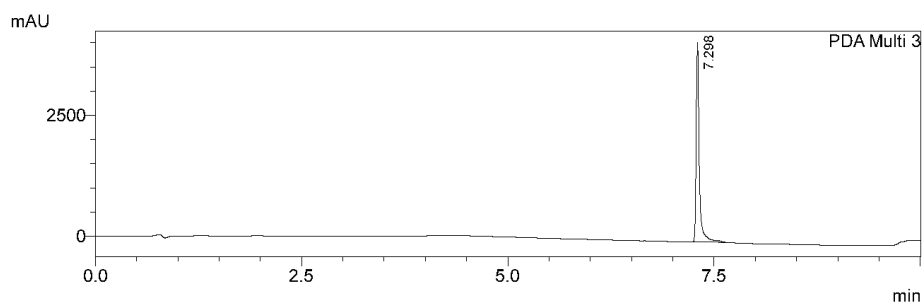

- 1 PDA Multi 1/254nm 4nm  
2 PDA Multi 3/220nm 4nm

PeakTable

PDA Ch1 254nm 4nm

| Peak# | Ret. Time | Area    | Height | Area %  | Height % |
|-------|-----------|---------|--------|---------|----------|
| 1     | 7.296     | 2485159 | 730190 | 100.000 | 100.000  |
| Total |           | 2485159 | 730190 | 100.000 | 100.000  |

PeakTable

PDA Ch3 220nm 4nm

| Peak# | Ret. Time | Area     | Height  | Area %  | Height % |
|-------|-----------|----------|---------|---------|----------|
| 1     | 7.298     | 10862190 | 4122074 | 100.000 | 100.000  |
| Total |           | 10862190 | 4122074 | 100.000 | 100.000  |

$^1\text{H}$  NMR of **5b** in  $\text{CDCl}_3$

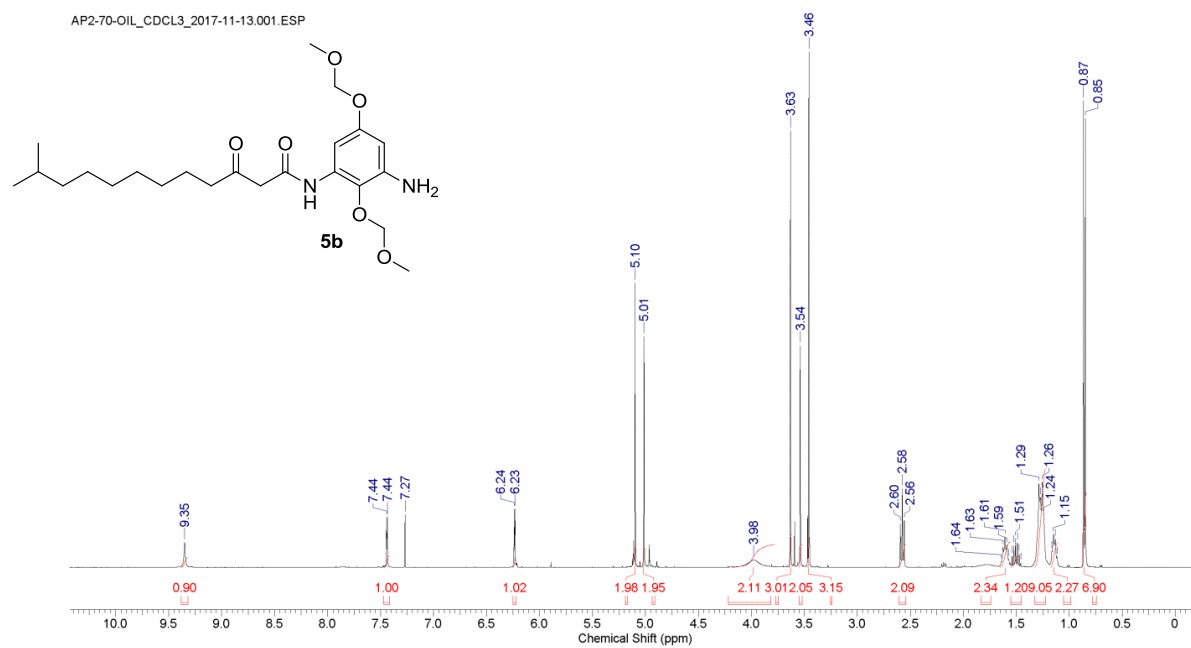

$^{13}\text{C}$  NMR of **5b** in  $\text{CDCl}_3$

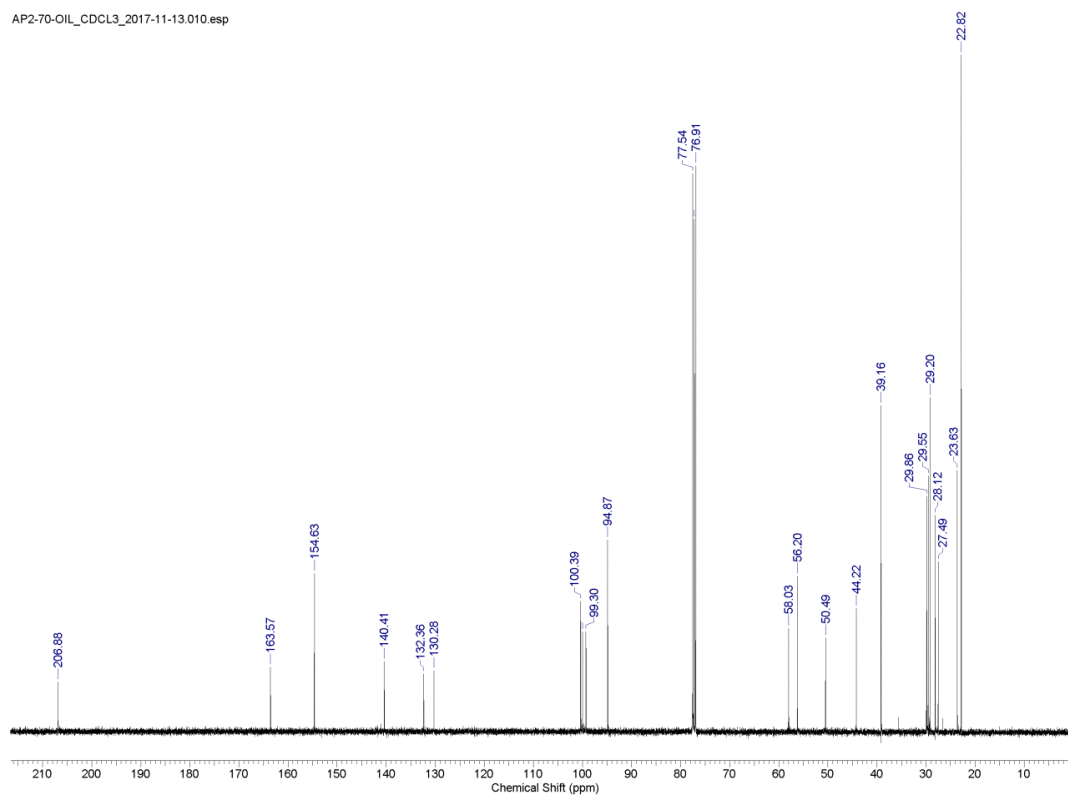

# HPLC chromatogram of 5b

1/30/2018 16:08:55 1 / 1

## ==== Shimadzu LCsolution Analysis Report ====

Sample Name : C:\LabSolutions\LCsolution\Sun\Allan Book2\AP2-70-final.lcd  
 Tray# : AP2-70-final  
 Vial # : 1  
 Injection Volume : 3  
 Data File Name : 10 uL  
 Method File Name : AP2-70-final.lcd  
 Batch File Name : SDQ gradient.lcm  
 Data Acquired : 11/13/2017 3:25:57 PM

### <Chromatogram>

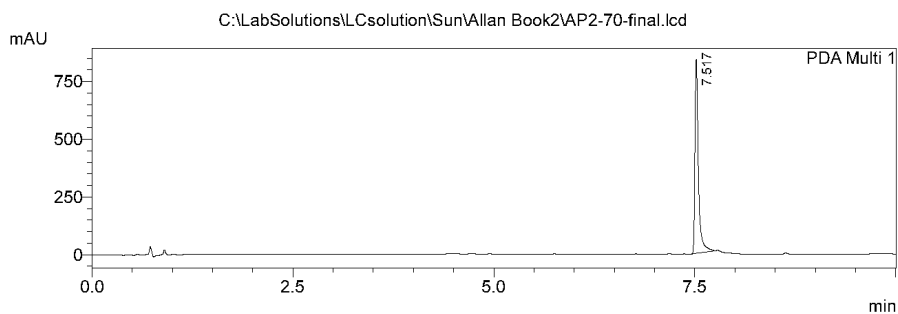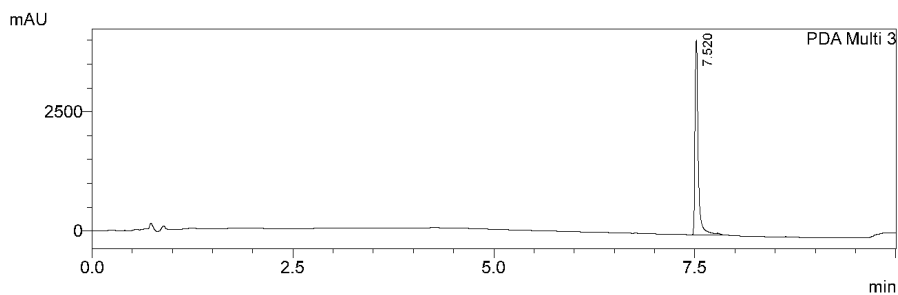

- 1 PDA Multi 1/254nm 4nm
- 2 PDA Multi 3/220nm 4nm

PeakTable

PDA Ch1 254nm 4nm

| Peak# | Ret. Time | Area    | Height | Area %  | Height % |
|-------|-----------|---------|--------|---------|----------|
| 1     | 7.517     | 2492122 | 836477 | 100.000 | 100.000  |
| Total |           | 2492122 | 836477 | 100.000 | 100.000  |

PeakTable

PDA Ch3 220nm 4nm

| Peak# | Ret. Time | Area     | Height  | Area %  | Height % |
|-------|-----------|----------|---------|---------|----------|
| 1     | 7.520     | 11403672 | 4080893 | 100.000 | 100.000  |
| Total |           | 11403672 | 4080893 | 100.000 | 100.000  |

C:\LabSolutions\LCsolution\Sun\Allan Book2\AP2-70-final.lcd

<sup>1</sup>H NMR of **7a** in CDCl<sub>3</sub>

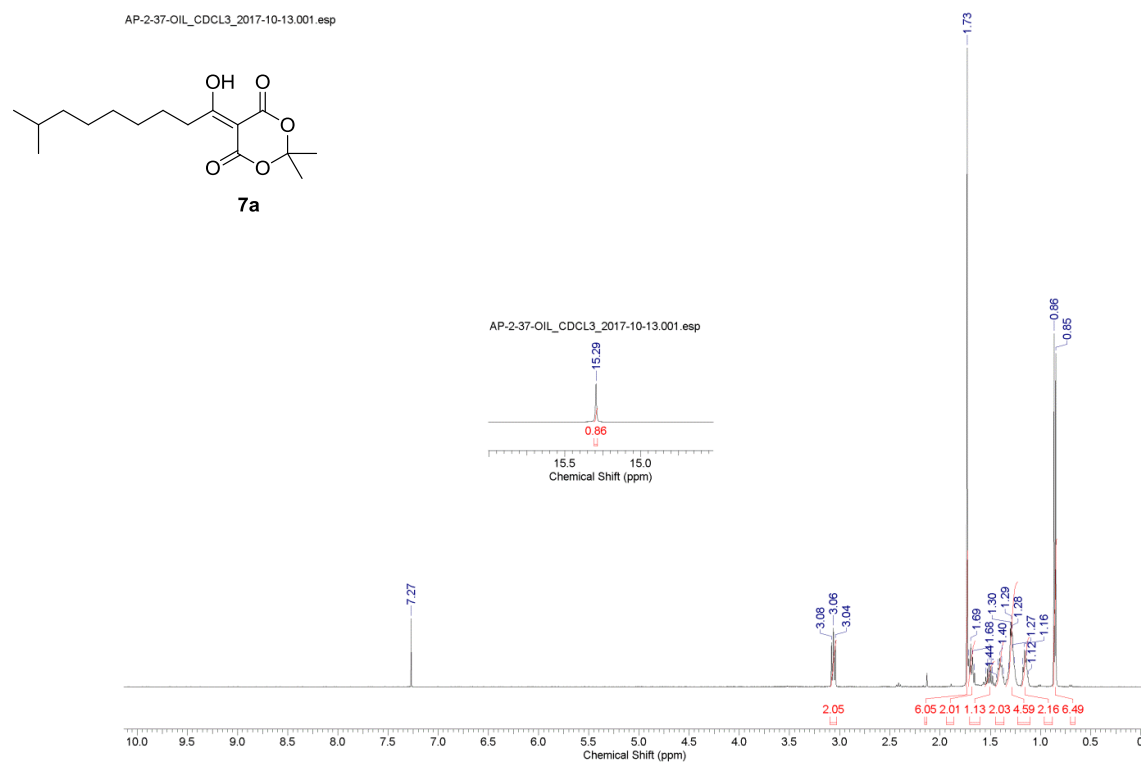

<sup>13</sup>C NMR of **7a** in CDCl<sub>3</sub>

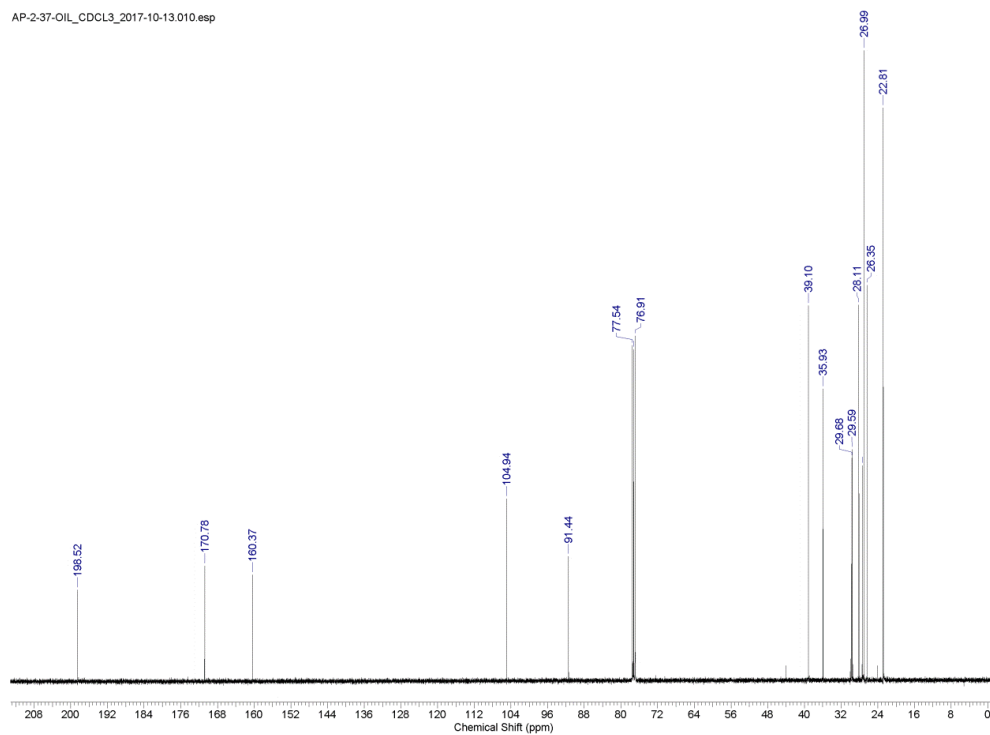

# HPLC chromatogram of 7a

1/30/2018 16:09:56 1 / 1

## ==== Shimadzu LCsolution Analysis Report ====

Sample Name : C:\LabSolutions\LCsolution\Sun\Allan Book2\AP2-37-final.lcd  
 Tray# : AP2-37-final  
 Vial # : 1  
 Injection Volume : 3  
 Data File Name : 10 uL  
 Method File Name : AP2-37-final.lcd  
 Batch File Name : SDQ gradient.lcm  
 Data Acquired : 10/13/2017 10:40:58 AM

### <Chromatogram>

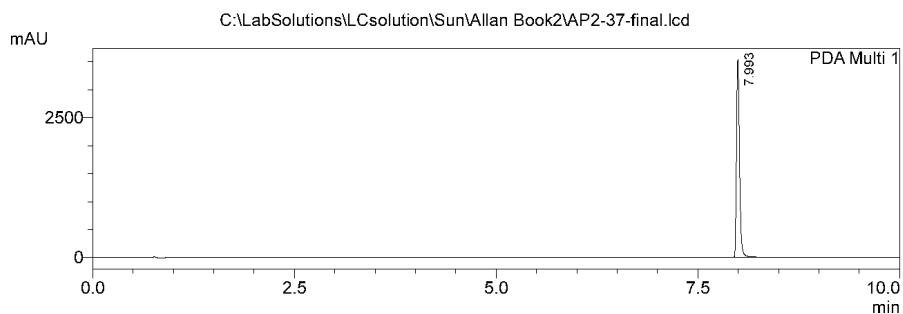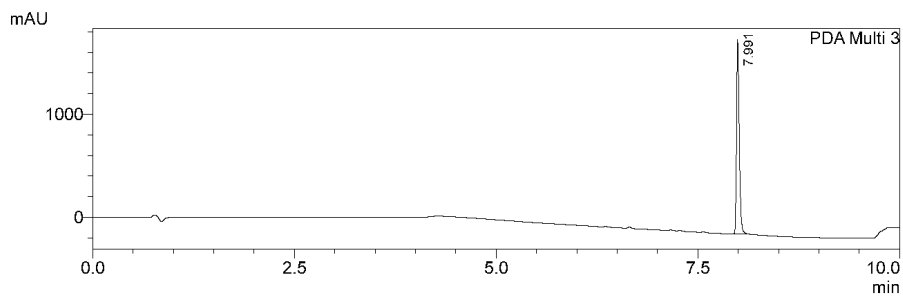

- 1 PDA Multi 1/254nm 4nm
- 2 PDA Multi 3/220nm 4nm

PeakTable

| PDA Ch1 254nm 4nm |           |         |         |         |          |
|-------------------|-----------|---------|---------|---------|----------|
| Peak#             | Ret. Time | Area    | Height  | Area %  | Height % |
| 1                 | 7.993     | 9032305 | 3440371 | 100.000 | 100.000  |
| Total             |           | 9032305 | 3440371 | 100.000 | 100.000  |

PeakTable

| PDA Ch3 220nm 4nm |           |         |         |         |          |
|-------------------|-----------|---------|---------|---------|----------|
| Peak#             | Ret. Time | Area    | Height  | Area %  | Height % |
| 1                 | 7.991     | 4248607 | 1884835 | 100.000 | 100.000  |
| Total             |           | 4248607 | 1884835 | 100.000 | 100.000  |

C:\LabSolutions\LCsolution\Sun\Allan Book2\AP2-37-final.lcd

$^1\text{H}$  NMR of **7b** in  $\text{CDCl}_3$

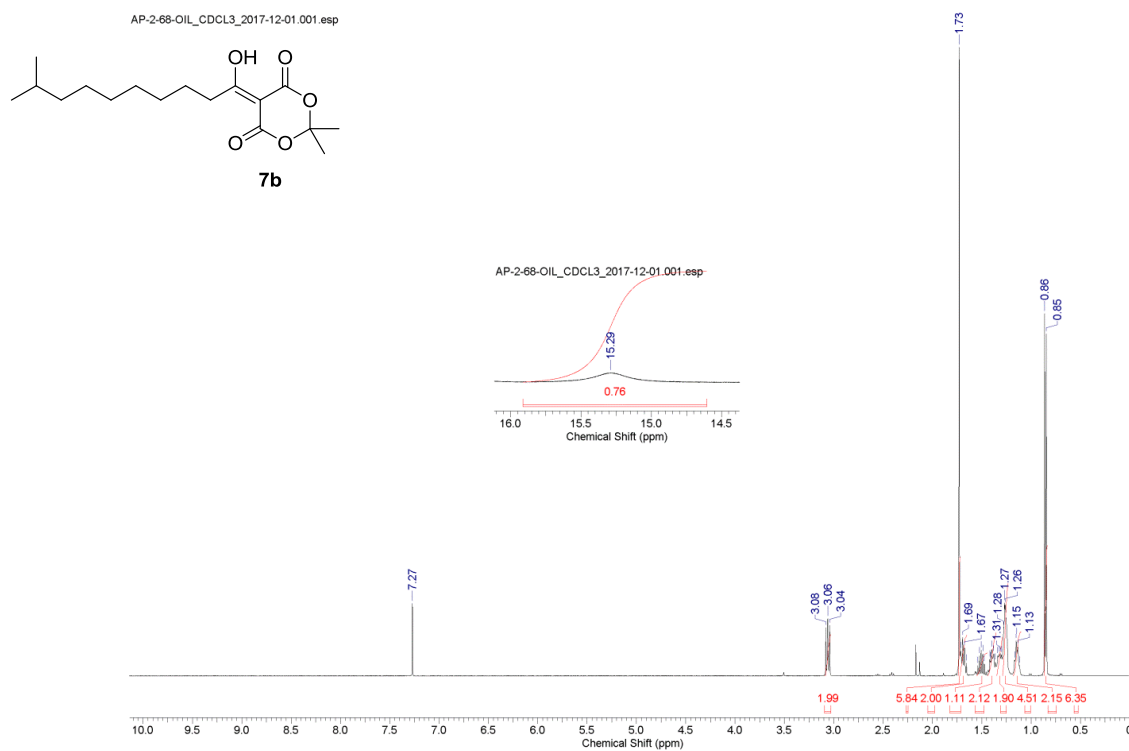

$^{13}\text{C}$  NMR of **7b** in  $\text{CDCl}_3$

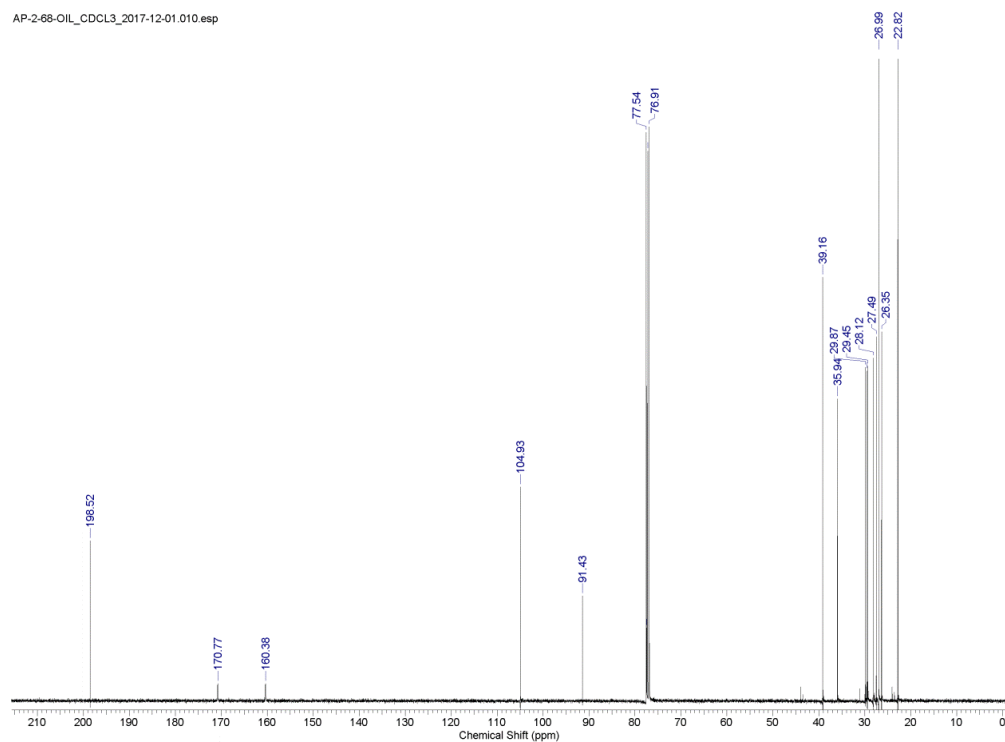

# HPLC chromatogram of 7b

1/30/2018 16:10:37 1 / 1

## ==== Shimadzu LCsolution Analysis Report ====

Sample Name : C:\LabSolutions\LCsolution\Sun\Allan Book2\AP2-68-final.lcd  
 Tray# : 1  
 Vial # : 11  
 Injection Volume : 10 uL  
 Data File Name : AP2-68-final.lcd  
 Method File Name : SDQ gradient.lcm  
 Batch File Name :  
 Data Acquired : 11/9/2017 2:47:57 PM

### <Chromatogram>

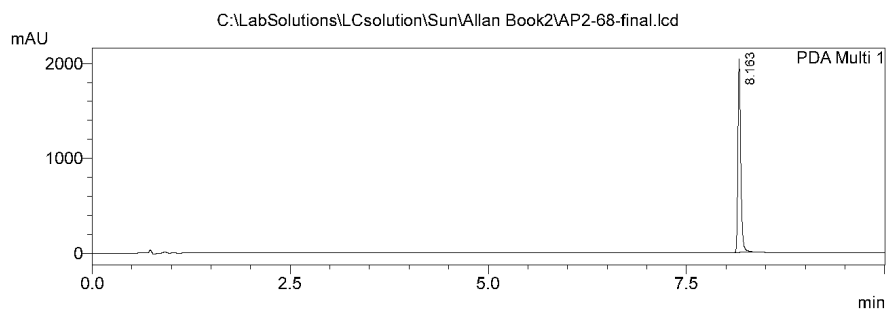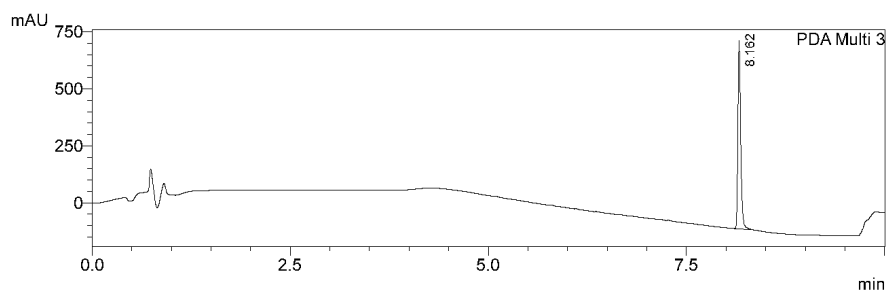

- 1 PDA Multi 1/254nm 4nm
- 2 PDA Multi 3/220nm 4nm

PeakTable

| PDA Ch1 254nm 4nm |           |         |         |         |          |
|-------------------|-----------|---------|---------|---------|----------|
| Peak#             | Ret. Time | Area    | Height  | Area %  | Height % |
| 1                 | 8.163     | 5084993 | 2007085 | 100.000 | 100.000  |
| Total             |           | 5084993 | 2007085 | 100.000 | 100.000  |

PeakTable

| PDA Ch3 220nm 4nm |           |         |        |         |          |
|-------------------|-----------|---------|--------|---------|----------|
| Peak#             | Ret. Time | Area    | Height | Area %  | Height % |
| 1                 | 8.162     | 2045199 | 825208 | 100.000 | 100.000  |
| Total             |           | 2045199 | 825208 | 100.000 | 100.000  |

C:\LabSolutions\LCsolution\Sun\Allan Book2\AP2-68-final.lcd

$^1\text{H}$  NMR of **13** in 1%  $\text{CF}_3\text{CO}_2\text{D}/\text{CDCl}_3$

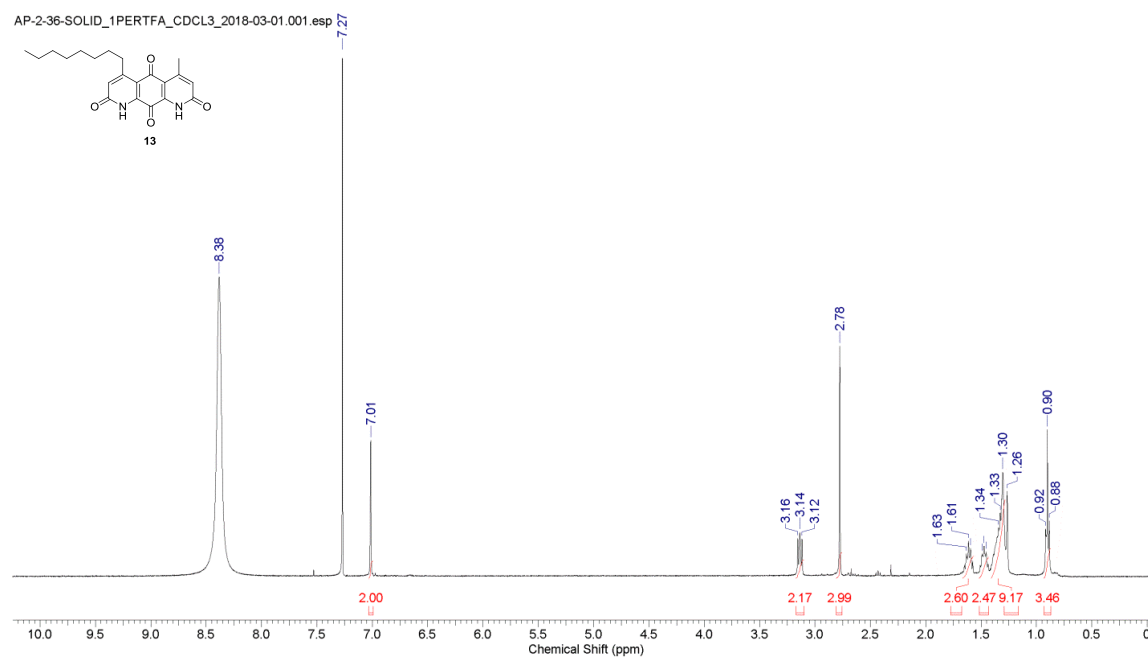

$^{13}\text{C}$  NMR of **13** in 2%  $\text{CF}_3\text{CO}_2\text{D}/\text{CDCl}_3$

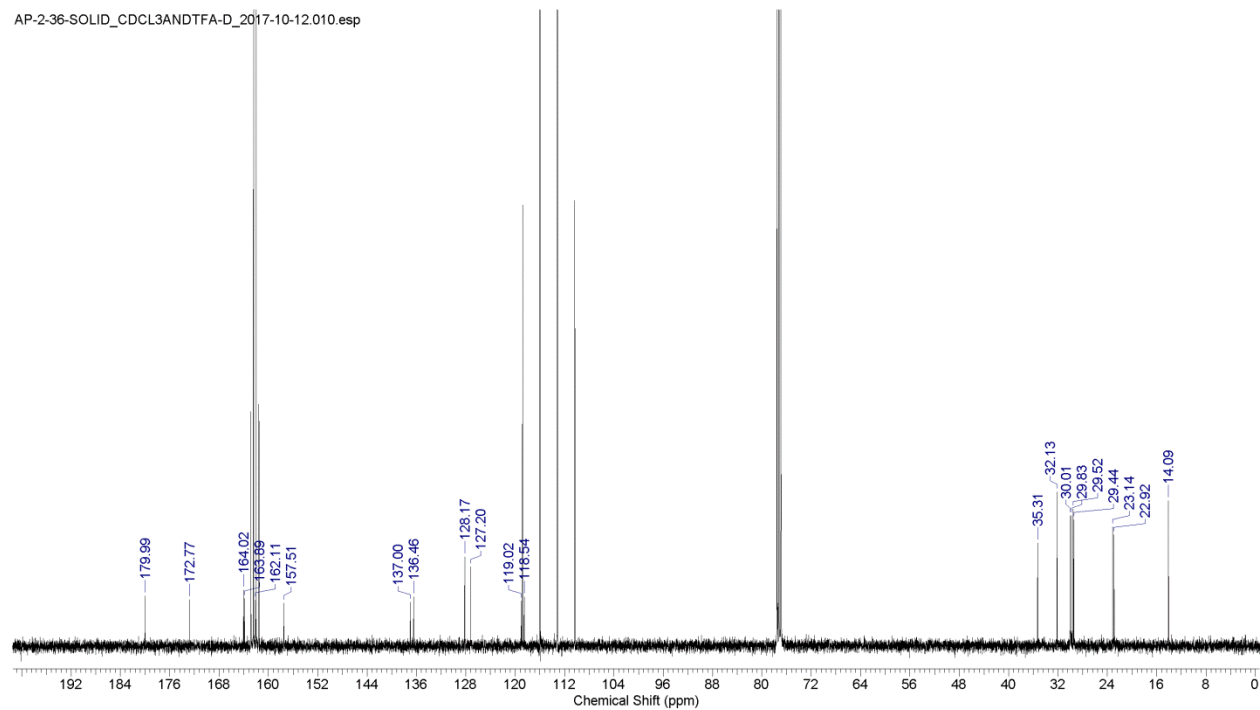

# Zoomed $^{13}\text{C}$ NMR regions of **13** in 2% $\text{CF}_3\text{CO}_2\text{D}/\text{CDCl}_3$

AP-2-36-SOLID\_CDCL3ANDTFA-D\_2017-10-12.010.esp

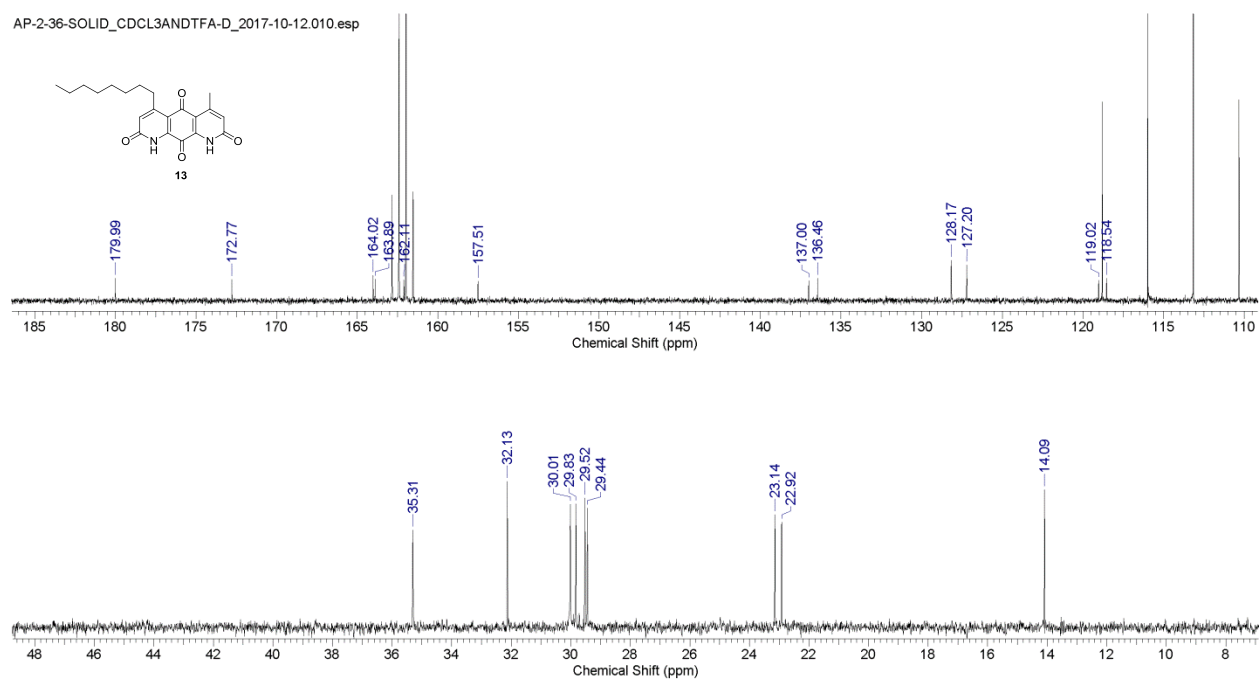

## HRMS of **13**

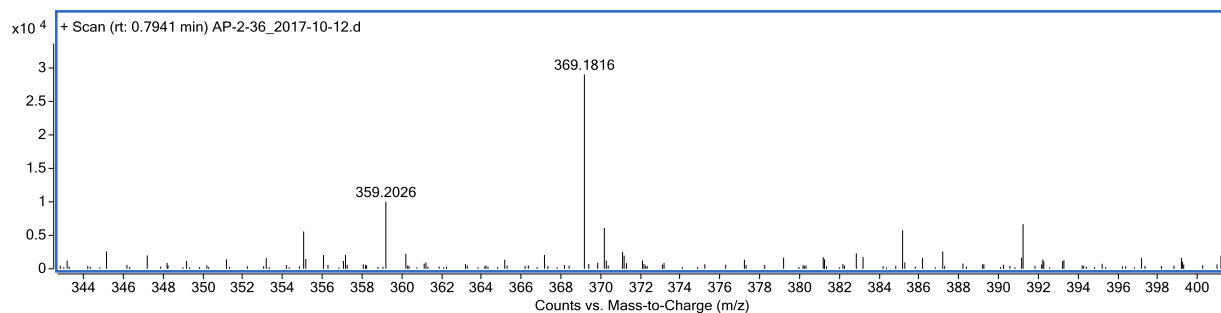

# HPLC chromatogram of 13

2/7/2018 14:53:46 1 / 1

## ==== Shimadzu LCsolution Analysis Report ====

Sample Name : C:\LabSolutions\LCsolution\Sun\Allan Book2\AP2-36-final.lcd  
 Tray# : AP2-36-final  
 Vial # : 1  
 Injection Volume : 10 uL  
 Data File Name : AP2-36-final.lcd  
 Method File Name : SDQ gradient.lcm  
 Batch File Name :  
 Data Acquired : 10/11/2017 12:53:00 PM

### <Chromatogram>

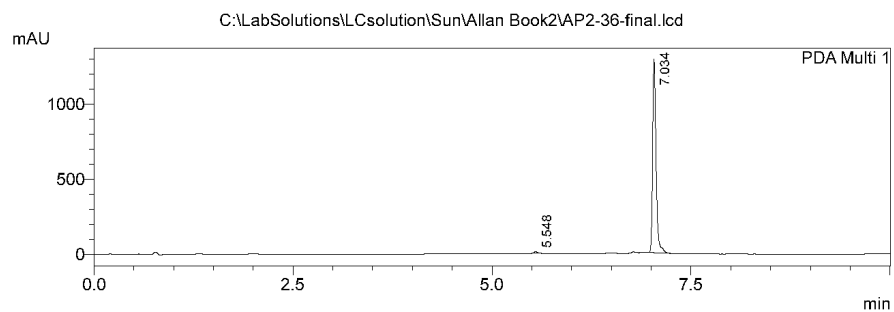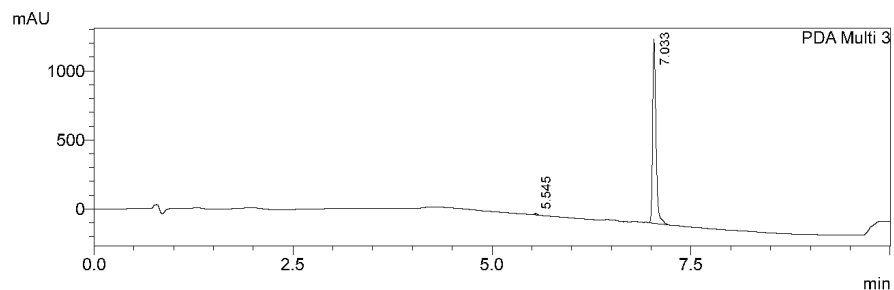

1 PDA Multi 1/254nm 4nm  
 2 PDA Multi 3/220nm 4nm

PeakTable

PDA Ch1 254nm 4nm

| Peak# | Ret. Time | Area    | Height  | Area %  | Height % |
|-------|-----------|---------|---------|---------|----------|
| 1     | 5.548     | 29880   | 11511   | 0.773   | 0.897    |
| 2     | 7.034     | 3837809 | 1271762 | 99.227  | 99.103   |
| Total |           | 3867689 | 1283273 | 100.000 | 100.000  |

PeakTable

PDA Ch3 220nm 4nm

| Peak# | Ret. Time | Area    | Height  | Area %  | Height % |
|-------|-----------|---------|---------|---------|----------|
| 1     | 5.545     | 30189   | 11069   | 0.768   | 0.824    |
| 2     | 7.033     | 3902002 | 1332447 | 99.232  | 99.176   |
| Total |           | 3932191 | 1343517 | 100.000 | 100.000  |

C:\LabSolutions\LCsolution\Sun\Allan Book2\AP2-36-final.lcd

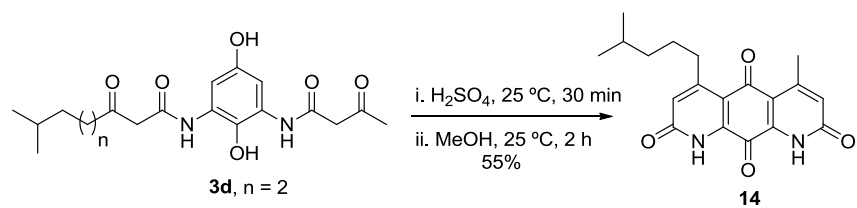

**Scheme S1** Synthesis of **14** with a shorter branched side chain.

$^1\text{H}$  NMR of **14** in 2%  $\text{CF}_3\text{CO}_2\text{D}/\text{CDCl}_3$

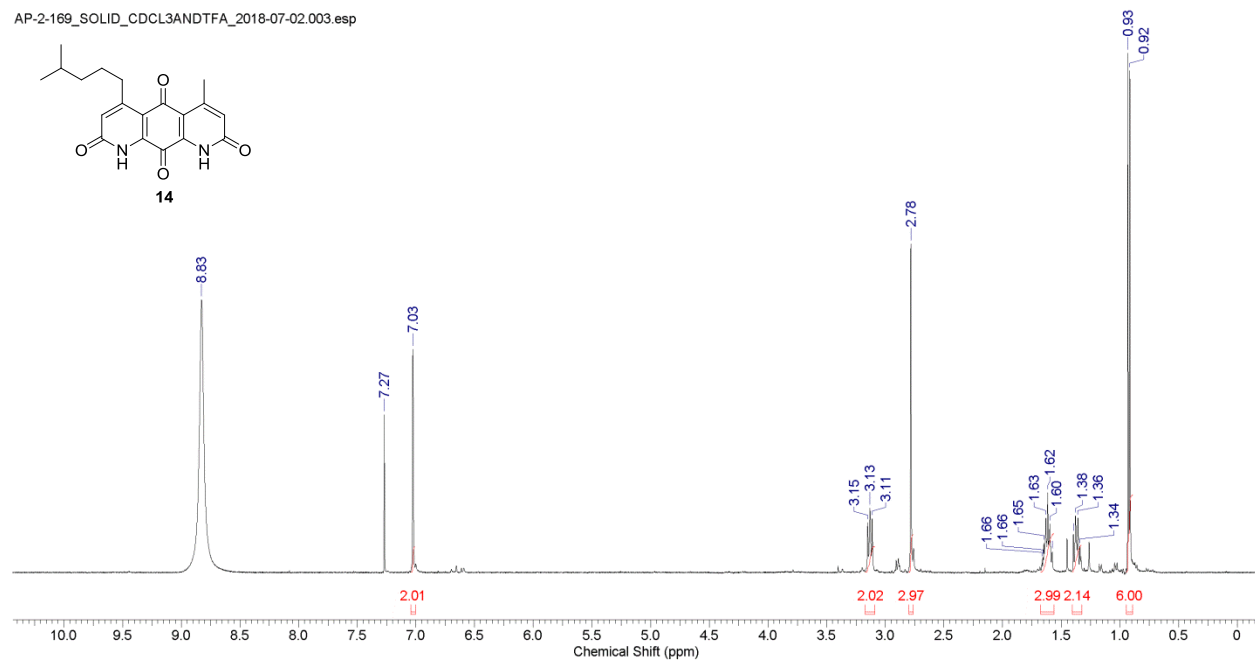

Zoomed  $^1\text{H}$  NMR of **14** in 2%  $\text{CF}_3\text{CO}_2\text{D}/\text{CDCl}_3$

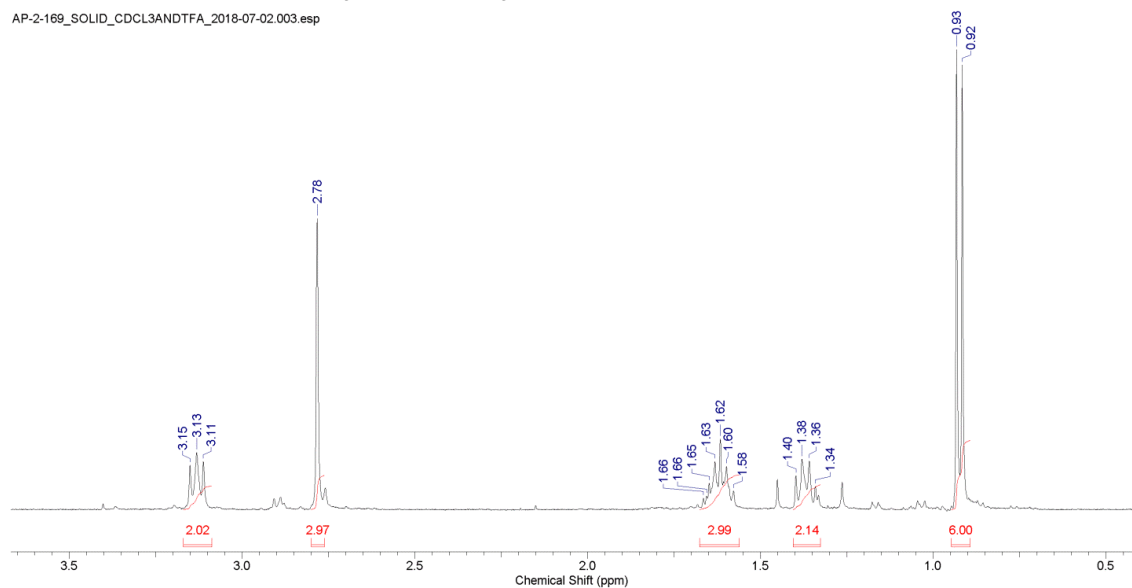

$^{13}\text{C}$  NMR of **14** in 2%  $\text{CF}_3\text{CO}_2\text{D}/\text{CDCl}_3$

AP-2-169\_SOLID\_CDCL3ANDTFA\_2018-07-02.010.esp

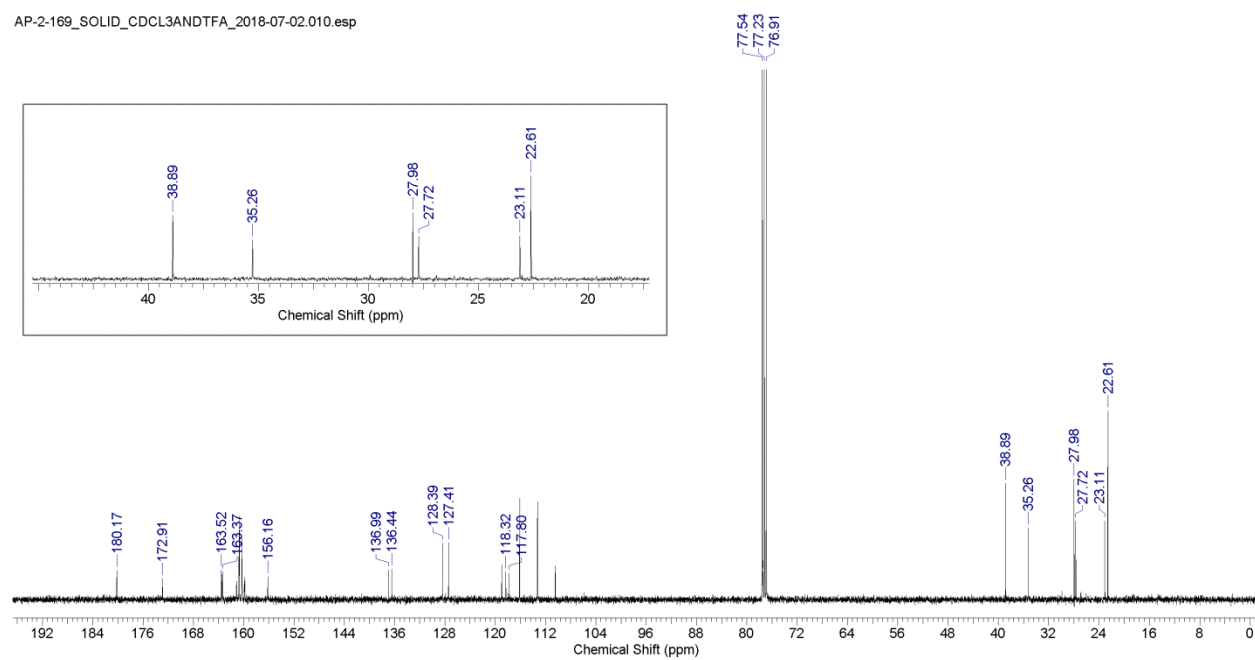

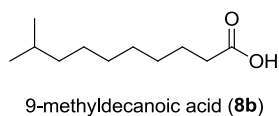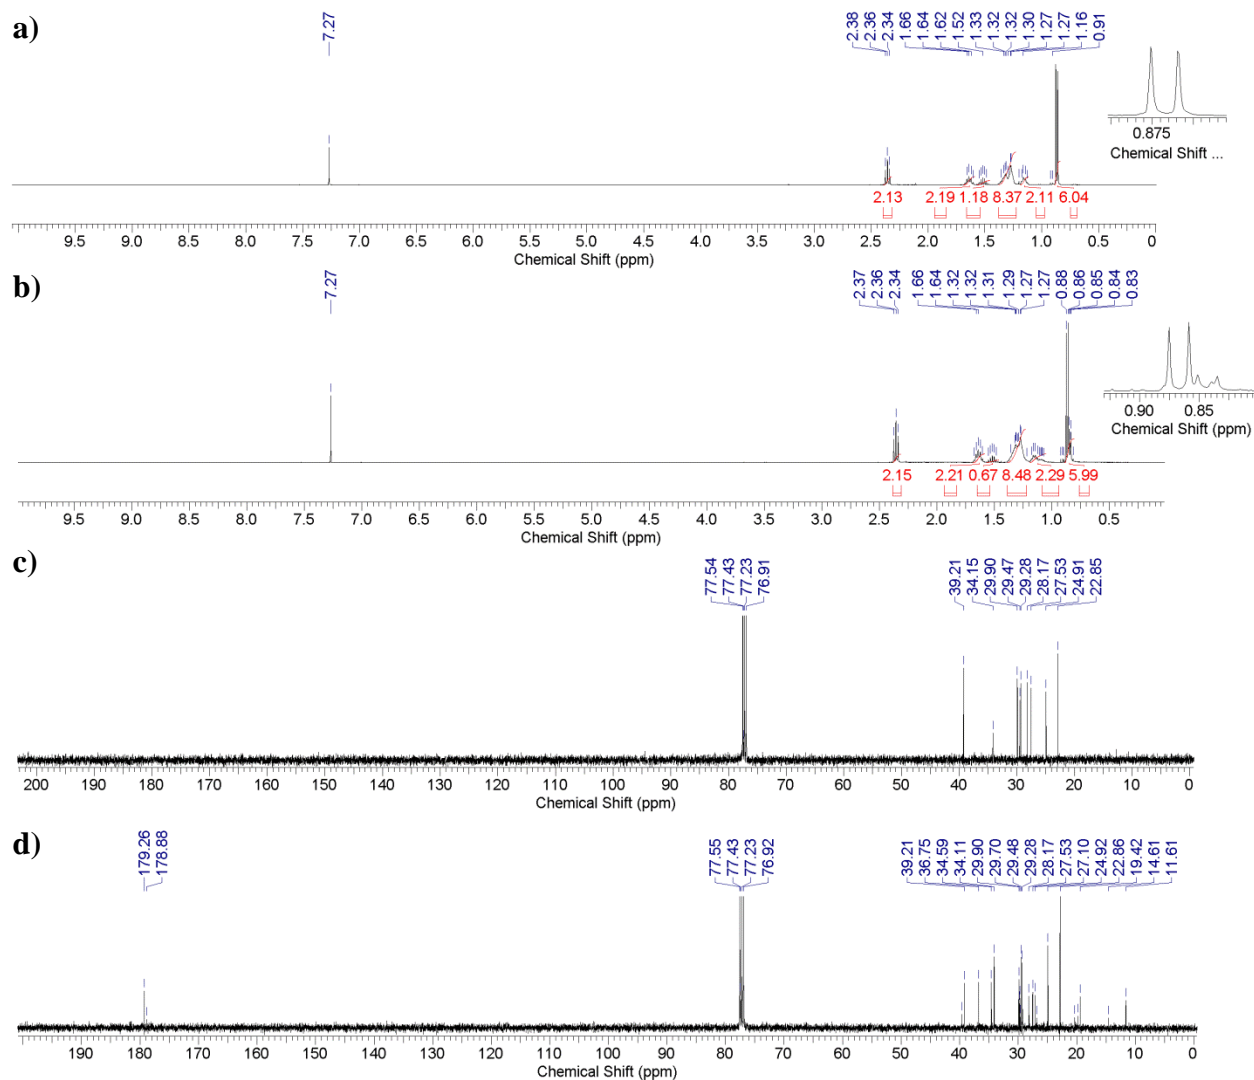

**Fig. S1** a)  $^1\text{H}$  NMR spectrum of 9-methyldecanoic acid; b)  $^1\text{H}$  NMR spectrum of 9-methyldecanoic acid after stirring 30 min in conc.  $\text{H}_2\text{SO}_4$  at room temperature; c)  $^{13}\text{C}$  NMR spectrum of 9-methyldecanoic acid; d)  $^{13}\text{C}$  NMR spectrum of 9-methyldecanoic acid after stirring 30 min in conc.  $\text{H}_2\text{SO}_4$  at room temperature. All NMR spectra were taken in  $\text{CDCl}_3$ .

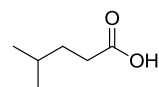

4-methylpentanoic acid

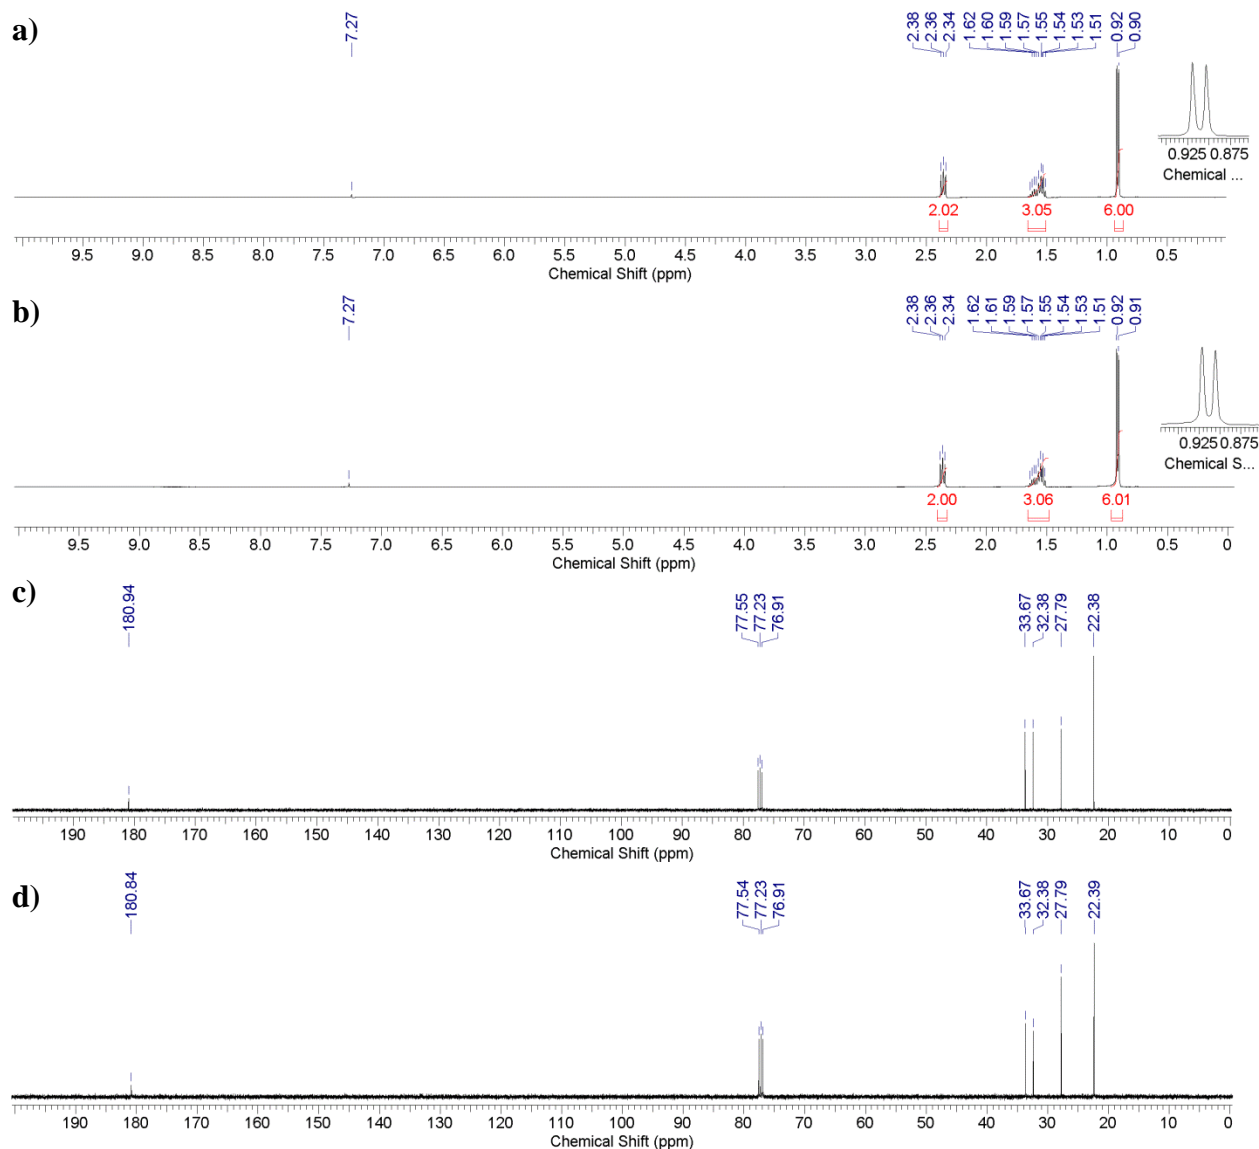

**Fig. S2** a)  $^1\text{H}$  NMR spectrum of 4-methylpentanoic acid; b)  $^1\text{H}$  NMR spectrum of 4-methylpentanoic acid after stirring 18 h in conc.  $\text{H}_2\text{SO}_4$  at room temperature; c)  $^{13}\text{C}$  NMR spectrum of 4-methylpentanoic acid; d)  $^{13}\text{C}$  NMR spectrum of 4-methylpentanoic acid after stirring 18 h in conc.  $\text{H}_2\text{SO}_4$  at room temperature. All NMR spectra were taken in  $\text{CDCl}_3$ .

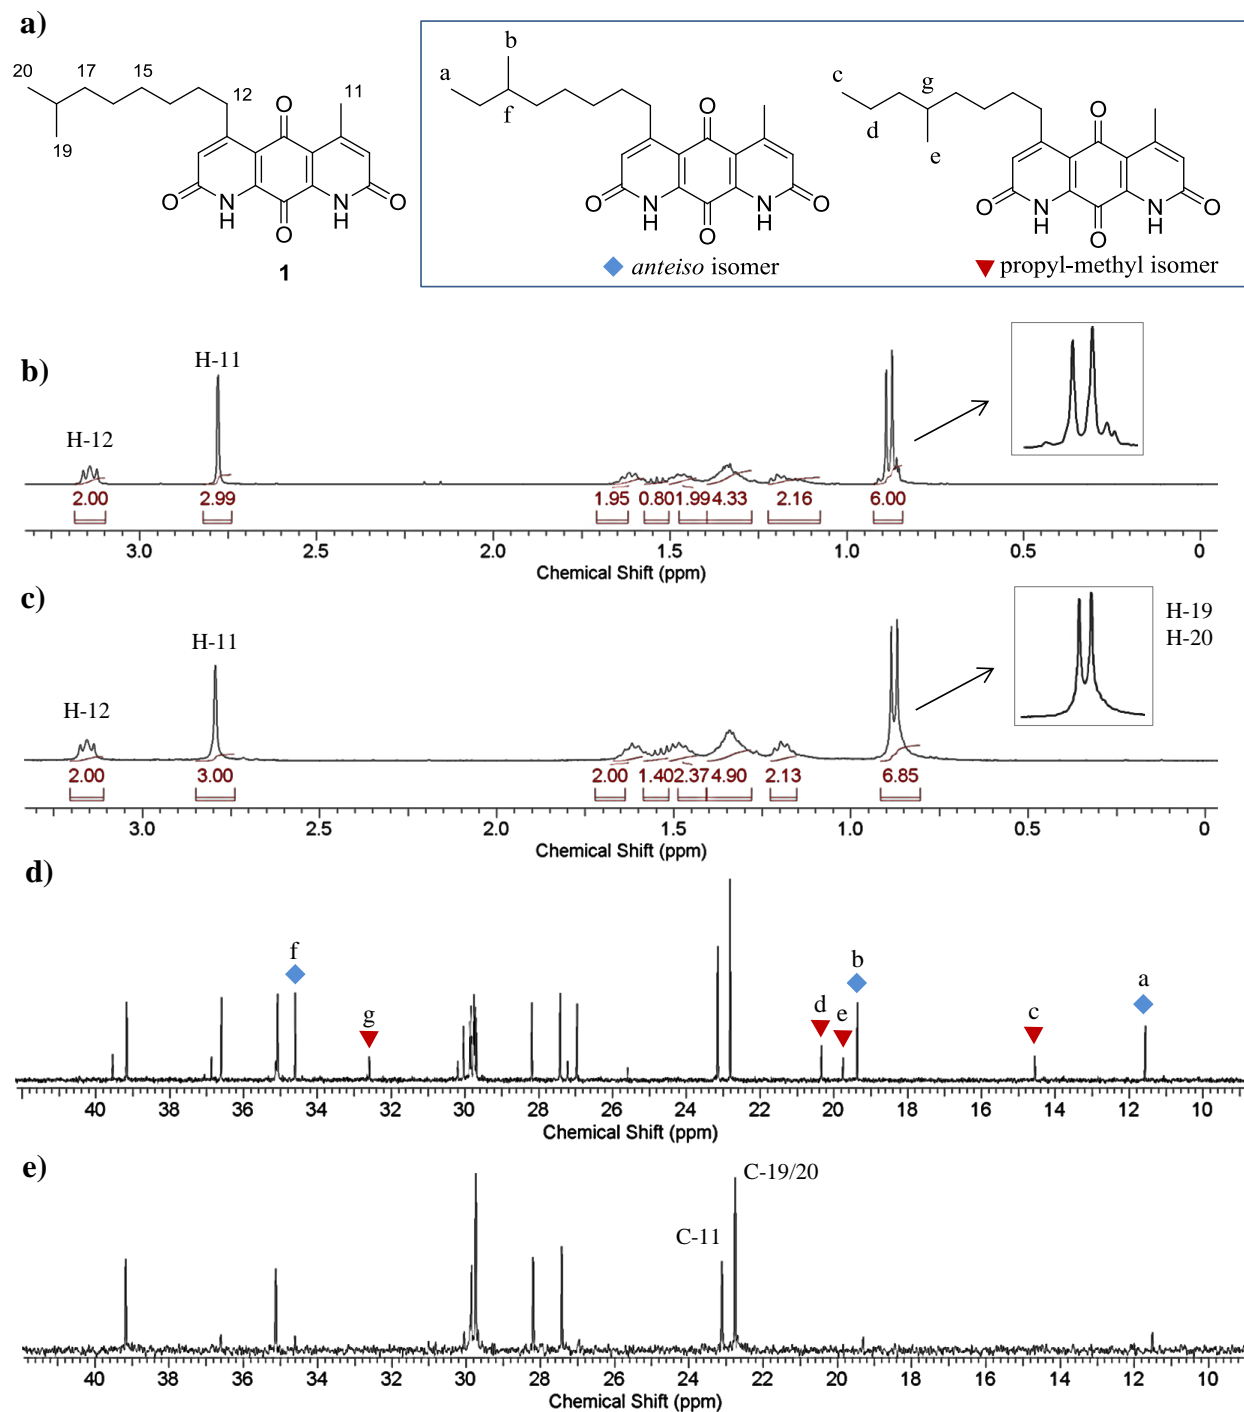

**Fig. S3** a) Structures of diazaquinomycin H (**1**) and proposed isomers. b) Zoomed  $^1\text{H}$  NMR spectrum of isomeric mixture of **1**; c) Zoomed  $^1\text{H}$  NMR spectrum of pure synthetic diazaquinomycin H (**1**); d) Zoomed  $^{13}\text{C}$  NMR spectrum of isomeric mixture of **1**; e) Zoomed  $^{13}\text{C}$  NMR spectrum of pure synthetic diazaquinomycin H (**1**).

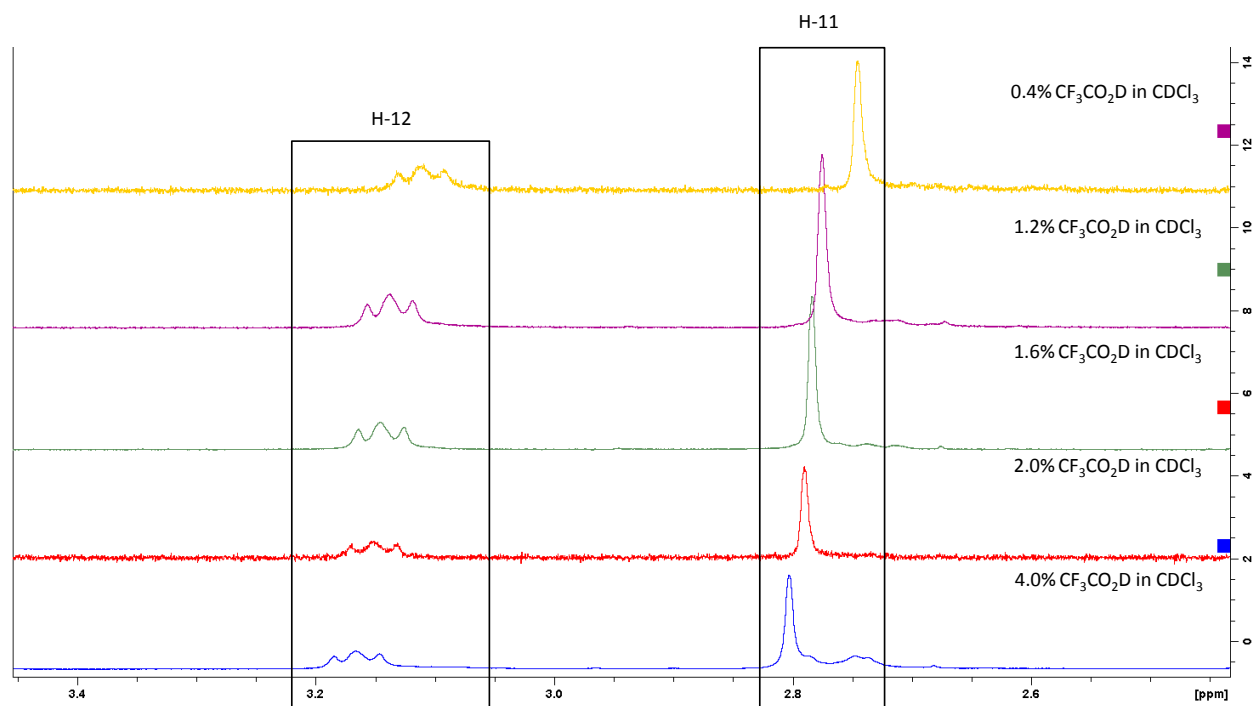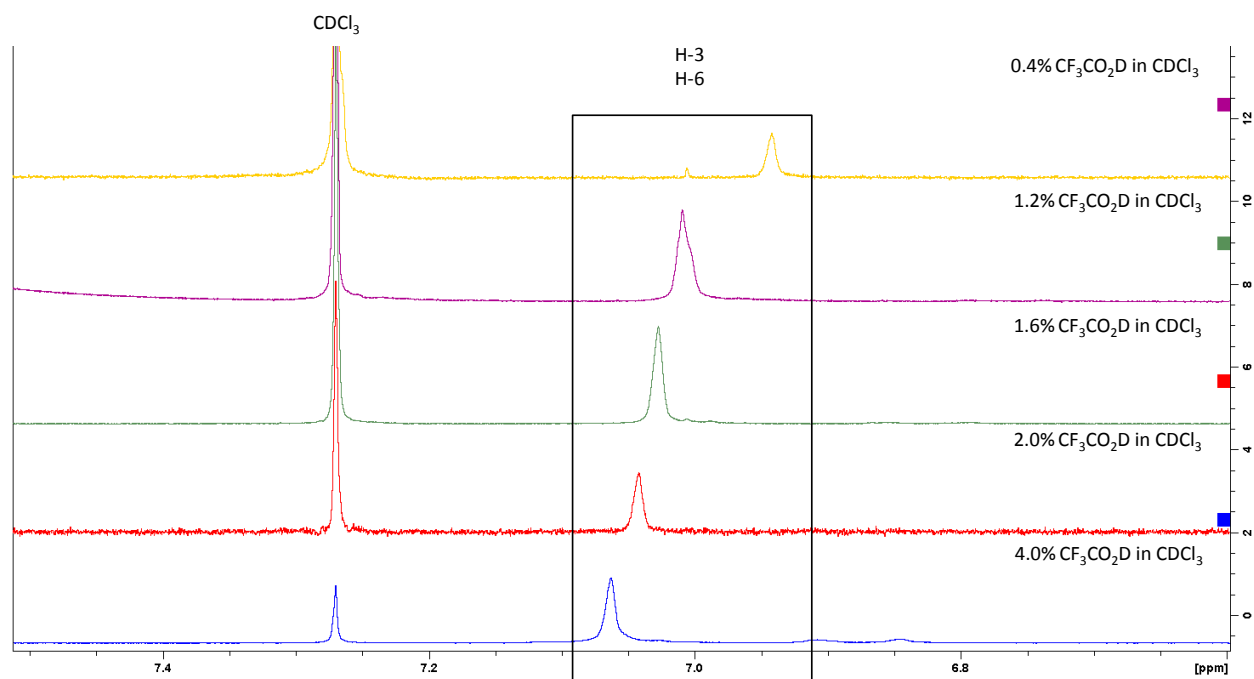

**Fig. S4** Zoomed  $^1\text{H}$  NMR of isomeric mixture of **2** in  $\text{CDCl}_3$  with varying concentrations of  $\text{CF}_3\text{CO}_2\text{D}$ .
